# The effect of maternal HMB supplementation on bone mechanical and geometrical properties, as well as histomorphometry and immunolocalization of VEGF, TIMP2, MMP13, BMP2 in the bone and cartilage tissue of the humerus of their newborn piglets

Agnieszka Tomczyk-Warunek<sup>1</sup>, Tomasz Blicharski<sup>1\*</sup>, Jaromir Jarecki<sup>1</sup>, Piotr Dobrowolski<sup>2</sup>, Siemowit Muszyński<sup>3</sup>, Ewa Tomaszewska<sup>4</sup>, Lucio C. Rovati<sup>5</sup>

<sup>1</sup> Chair and Department of Rehabilitation and Orthopaedics, Medical University in Lublin, Lublin, Poland;

<sup>2</sup> Department of Functional Anatomy and Cytobiology Animal Physiology, Maria Curie-Skłodowska University, Lublin, Poland;

<sup>3</sup> Department of Biophysics, University of Life Sciences in Lublin, Lublin, Poland;

<sup>4</sup> Department of Animal Physiology, University of Life Sciences in Lublin, Lublin, Poland;

<sup>5</sup> School of Medicine and Surgery, University of Milano-Bicocca, Monza, Italy

\*Corresponding author:

e-mail: blicharski@vp.pl (TB)

# Abstract

The presented experiment focuses on assessing the impact of HMB (hydroxy- $\beta$ -methobutyrate) supplementation of mothers during pregnancy on the development of the skeletal system of their offspring. For this purpose, an experiment was carried out on 12 clinically healthy sows of the Great White Poland breed, which were divided randomly into two groups the control and the HMB group. All animals were kept under standard conditions and received the same feed for pregnant females. In contrast, females from the HMB group between 70 and 90 days were supplemented with 3-hydroxy-3-methylbutyle in the amount of 0.2g/kg b.w/day. Immediately after birth, the piglets were also divided into groups based on: sex, and presence or lack HMB supplementation, and subsequently were euthanized and humerus bones from all piglets were collected.

Mother's HMB supplementation during pregnancy affected the multiple index of their offspring. The higher humerus mass and length was observed with the greater effect in males. Maternal supplementation also influenced on the geometrical and mechanical properties of the humerus as in the case of mass, this effect was higher in males. Also, the collagen structure of the compacted and trabecular bone changed under the HMB addition. Maternal supplementation also affected the expression of selected proteins in growth cartilage and trabecular bone. The obtained results show that the administration to the mother during pregnancy by the HMB significantly affects the development of the humerus in many ways. The obtained results also confirm the utility of such experiments in understanding of the importance of the pregnancy diet as an develop and adaptable factor of offspring organisms and are the base for further research in that area as well as in the protein markers expression area.

## Introduction

The growth and ossification of individual skeletal elements during prenatal development is different. Studies in animal models showed that the humerus growth and ossification begins much faster than the other long bones, which means that it reaches its length faster [1]. Differences in the development of individual skeletal bones may contribute to the appearance of different adaptive changes during fetal development as a result of environmental changes [2]. Studies in animal models (including pigs whose genome is much more similar to the human genome compared to other animal models) show that undernutrition of the mother during pregnancy significantly affects the skeletal system of her offspring. The effect of maternal nutrition during pregnancy on fetal development has also been confirmed in human studies [2]. The pigs compared to other animal models (mice, rats) are characterized by a very similar size and physiology of internal organs to humans, therefore it is a very good model in preclinical studies and in nutritional experiments [3].

Changes in the skeletal system during prenatal development may in later life contribute to the earlier appearance of osteopenia, as a consequence, osteoporosis [4-7]. As a result of osteoporotic changes, fractures occur not only in the proximal femur, but also in the proximal humerus or distal radius [8].

One of the nutritional factors studied is the supplementation of hydroxy- $\beta$ -methobutyrate (HMB), which occurs naturally in the body. It is mainly responsible for the proper functioning of the cell membrane, and also participates in *de novo* cholesterol synthesis [9]. It is formed as a result of the degradation of the branched-chain amino acid leucine in the body. Only 5% of the leucine is used for the production of hydroxy- $\beta$ -methobutyrate [10, 11]. In human nutrition, HMB is used as a supplement for athletes, which is associated with a reduction of the body fat, and an increase in the physical strength of the

muscle tissue. This agent has also an anti-catabolic activity, inhibiting protein degradation and protecting muscles against damage [9, 12]. This proves that HMB supplementation can be used as a therapeutic agent in the treatment of elderly sarcopenia. This supplement is also used during the convalescence period [13]. It is not recommended during pregnancy. However, there is no information about any negative effects of using this supplement on fetal development during this period. That is why this supplement has become an area of research interest in recent years. There are few experimental studies using animal models explaining the effect of the HMB supplementation in the prenatal period. However, in the last few years some have been related to the influence of this supplement on the skeletal system. [14-20]. In the literature the information on the impact of this supplement on the femoral bone of newborn organisms whose mothers had the HMB supplementation during pregnancy [16, 17]. In these studies, the sows were supplemented between days 70 and 90 of pregnancy, and HMB was administered at a daily dose of 0.2 g/kg of body weight. However, there is no information on the impact of HMB maternal supplementation on the development of the humerus of their newborn offspring. Other ontogenetic development as well as different functions of the humerus may indicate that, in addition to the femur, it may be a model bone for studying skeletal system [1, 5, 21]. The humerus is also an object of interest for researchers, because in adulthood fractures of the proximal humerus occur more frequently than fractures of the proximal femur [22].

An indicator of changes in the skeletal system of offspring of mothers supplemented with HMB may not only be the basic bone properties such as: length, mass, mechanical, geometric properties, histomorphometry of bone and cartilage tissue. Also protein expression and immunolocalization in bone and cartilage can be used as an indicator [17]. For this purpose: VEGF (Vascular endothelial growth factor), TIMP2 (Tissue inhibitor of metalloproteinases), MMP13 (Matrix metalloproteinase 13), BMP2 (Bone morphogenetic

protein 2) expressions can be determined. VEGF is a signal protein that stimulates cell function and is responsible for the formation of blood vessels. As is known, adequate blood supply to bone promotes metabolism [23]. BMP2 stimulates the development of bone and cartilage tissue by influencing the formation of type II collagen fibers [24, 25]. MMP13 or collagenase-3 is responsible for the resorption of bone and cartilage, by degradation of collagen fibers mainly type II but also type I found in the matrix of these tissues. It shows strong expression in the course of embryonic development and can influence the process of modeling these tissues. TIMP2 is an MMP13 antagonist. The available literature also reports that BMP 2 also inhibits the action of MMP13 [46]. The interaction between of the above proteins determines the proper development of the bone [26].

To our knowledge, there are also no studies that show the effect of maternal HMB supplementation on the immunolocalization of VEGF, BMP2, TIMP2, MMP13 which significantly affect the osteolytic and osteogenic processes in the bone and growth plate cartilage in the offspring. There is also no information whether maternal supplementation influences the prenatal development of the humerus, although the literature reports that it affects the growing of the femur. As it known that these two bones are characterized by different ontogenetic development, in order to complete the knowledge the aim of the study was to examine the effect of HMB supplementation on femora development in the pig model offspring.

# **Material and methods**

## **Experimental model**

The experiment was accepted by the Local Ethical Committee of Animals at the University of Life Sciences in Lublin (Resolution No. 30/2013 of 16/04/2013). All stages of the experiment were carried out in accordance with its requirements.

The experiment was conducted on 24 newborn piglets “before first colostrum uptake” born by 12 sows of Large White Polish. All experimental animals were clinically healthy and bred to the same boar. Primiparous sows were used in the study to avoid the impact of the number of pregnancies on birth weight in the offspring. The females used in this experiment were of similar age – 10 months and weight – between 100 to 120 kg. Animals were kept in separated cages, with the temperature and the humidity control on a 12-hour daily cycle. The females were had free access to fresh water. The pregnant sows were fed twice a day (2,3kg), with balanced standard compound feed for pregnant and lactating sows [16]. The pregnant females randomly divided in to two groups: control (n = 6) and experimental (HMB, n = 6). The experimental group was supplemented, with HMB of the dose 0.2g HMB /of the body weight/day between 70 and 90 days of the pregnancy during morning fed. For supplementation was used HMB in the form of calcium salts, while pregnant sows from control groups were supplementation with placebo – CaCO<sub>3</sub> at the same dose. This HMB dose was selected based on previous studies that used the same dose of hydroxy-β-methylbutyrate and had a significant effect on offspring development [16, 17, 27]. In this study we decided to supplement sows between 70 to 90 days of pregnancy, because this is critical moment to prenatal development in piglets [28].

All piglets born by physiological partum. No difference in body weight of newborn piglets was observed (Grubbs statistic), therefore 6 individuals from each sex were randomly

selected from both groups (one female and one male from one mother). Next newborn piglets were subjected to euthanasia using lethal doses of pentobarbitalum natricum (Morbital, Biowet, Puławy, Poland). Both humerus were isolated and cleaned of soft tissue. Bones were weighed and measured, and then frozen at  $-25^{\circ}\text{C}$  for storage until further analysis. The right humerus were intended for geometric measurements and tissue density analyzes. The humerus taken from left side of the body were intended for mechanical analyzes and histological examination.

## **Bone mechanical properties**

Before proceeding to the test, all bones of the humerus were thawed at the room temperature. The mechanical properties were examined using a three-point bending test. The test was carried out using a Zwick Z010 testing machine (Zwick GmbH & Company KG, Ulm, Germany), with a constant load [29]. The bones were placed on supports. The distance between supports was 40% of the total bone length. On the basis of the recorded force-deflection curves, the maximum elastic strength and the ultimate strength were determined [17, 29].

## **Tissue density of the bone and the cartilage**

The study was carried out in the proximal humerus for both bone and cartilage. Prior to the measurement, the test material was dried at  $105^{\circ}\text{C}$  to remove water. The study was carried out with a Micrometrics AccuPyc 1330 helium pycnometer (Micromeritics, Inc., Norcross, GA). The results of BTD were expressed in  $\text{g}/\text{cm}^3$  [29].

## **Bone geometric properties**

Right humerus were cut across in the middle of the shaft using a diamond bandsaw

140 (MBS 240/E, Proxxon GmbH, Foehren, Germany). Then the diameters: external horizontal (H) and internal (h), vertical external (B) and internal (b) were measured with a digital caliper. Based on which were calculated: the cortical cross-sectional area (A), the mean relative wall thickness (MRWT) and the cortical index (CI) were calculated. In addition, a secondary moment of the inertia (Ix) was calculated [29]. The study of geometric features describes the following formulas:

- A - cross-sectional area:

$$A = \frac{\pi}{4} (H \cdot G - h \cdot b)$$

- MRWT - mean relative wall thickness:

$$MRWT = \frac{[(\frac{B-b}{B}) + (\frac{H-h}{H})]}{2}$$

- CI - cortical index:

$$CI = \frac{[(\frac{B-b}{b}) + (\frac{H-h}{h})]}{2} \cdot 100\%$$

- Ix - second moment of inertia about horizontal axis:

$$Ix = \frac{\pi}{64} (H \cdot B^3 - h \cdot b^3)$$

## Bone histology

After mechanical properties measurements the proximal end of right humerus was cut. The obtained material was initially fixed in a 4% buffered formalin solution. Then material was decalcified using a buffered 10% EDTA solution. Next, the material was dehydrated in increasing gradient of the EtOH. The bone fragments were prepared for standard histological and microscopic procedure. The material was cut into 4 µm thick sections using the HM360 microtome (Microm, Wolldar, Germany) [30 ,31]. For the trabecular bone, the growth plate and the joint cartilage, the Goldner's trichrome staining was performed [32].



PSR (Picrosirius red) staining was performed to analyze the proportion of the mature and immature collagen fibers in the trabecular bone and the cortical bone [18, 33]. Stained sections were analyzed using microscope (Olympus BX63; Olympus, Tokyo, Japan) under normal (Goldner) and polarized light (PSR).

## **Histological analysis of the trabecular bone, the growth plate, the articular cartilage and the collagen structure**

In the growth plate cartilage the thickness of four zones and total thickness was measured. The first (I) resting zone has a large amount of matrix that separates the individual chondrocytes or isogenic groups. In the second (II) proliferating zone, chondrocytes form columns, their shapes flatten, and they are subject to intense division. In the third (III) hypertrophic zone, cartilage cells increase their volume, lose nuclei, and create regular columns. In the fourth (IV) calcium zone, cartilage cells undergo apoptosis. This is the place where the cartilage goes into the bone [30, 32].

In the articular cartilage, the thickness of three zones and the total thickness were measured. In the first (I) superficial zone, the cartilage cells are small, flattened, and parallel to the surface of the cartilage. The second (II) transition zone has a large number of matrices in which chondrocytes are larger, have a round shape, and are arranged alone or form isogenic groups. In the third (III) deep zone, the number of chondrocytes increases, and they regularly form columns [34, 35]. Obtained images were analyzed using the Olympus cell-Sens Version 1.5 graphics analysis software (Olympus, Tokyo, Japan).

The bone volume (BV) and the bone tissue (TV) based on the number of pixels for the epiphysis and the metaphysis were determined. On the basis of the above-mentioned parameters, the ratio of the bone volume to the bone tissue (BV/TV), which was expressed as a percentage, was determined. In the trabecular bone, the number of trabeculae (Tb. N), the

thickness of individual trabeculae (Tb.Th), the distance between individual trabecular (Tb.Sp) were determined [34, 35]. The microscope pictures were analysis using the ImageJ software (Wayne Rasband, National Institute of Mental Health, 165 Bethesda, MD, USA). This program was also used for the analysis of the collagen structure.

## Immunohistochemical analysis

For immunohistochemical analysis, deparaffinization and hydration of sections of bone and cartilage tissue were assigned. The next step was to recover the antigenicity of the tested material by enzymatic reactions, by using the proteinase K (Sigma-Aldrich, St. Louis, MO, USA). This step lasted 10 min and was carried out at 37°C. Then, the a 3% hydrogen peroxide solution was used to block the peroxidase activity. The incubation was carried out at the room temperature for 5 min. When this process was completed, the normal serum was applied to slides to block all non-specific reactions. This process lasted 30 min and was carried out at 37°C. The next step was the application of the primary antibody: MMP13 (Abcam, Cambridge, UK, concentration 10-20µg/ml), TIMP2 (Abcam, Cambridge, UK, dilution 1:100), VEGF (Biorbyt, Wuhan, Chine, concentration 0,5mg/ml) and BMP2 (Abcam, Cambridge, UK, dilution 1:250). Incubation lasted all night at 4°C. The next day, a secondary antibody: the biotinylated anti-rabbit immunoglobulin (nr. ab6730, Abcam, Cambridge, UK, dilution 1:200) was applied and incubated for 30 min at 37°C. For negative control for each antibody the same procedure was carried out, but without the first antibody. Next DAB (3,3'-diaminobenzidine tetrahydrochloride DAB, Sigma-Aldrich, St. Louis, MO, USA) was applied and incubated for 15 min at the room temperature. For contras staining was used haematoxylin (Sigma-Aldrich, St. Louis, MO, USA) [17].

Microscopic observations allowed to evaluate immunolocalization of MMP13, TIMP2, VEGF, BMP2 in tubercular bone and growth place cartilage, as negative control

(nuclei are blue) or positive control (nuclei are brown). The brown color indicates the presence of proteins [16, 17].

## Statistical analysis

The statistical analysis of the obtained results was carried out using the software Statistica 13.1 (TIBCO Software Inc., Palo Alto, CA, USA). Differences between the results were tested using a two-way ANOVA analysis of variance (sex, supplementation) and Tukey's post-hoc test. The normal distribution of data was checked using the Shapiro-Wilk W test, while the homogeneity of variance was tested using the Levene's test. Statistically significant differences were assumed for  $P < 0.05$ .

## Results

### Bone basis and geometrical properties

In offspring whose mothers received HMB during pregnancy, the bone weight was significantly higher compared to the control. This effect was observed in both sexes. In males, the use of HMB in their mothers also caused significant increased the length of the humerus. Also, for males there was a significant increase in the vertical and horizontal external diameter, the cross sectional area, the mean wall thickness and the cortical index in comparison to the control group. These effects were not observed in females whose pregnant mothers were supplemented with HMB. In both sexes of the experimental groups a significant increase in the moment of inertia was observed (Table 1).

**Table 1. The effect of maternal treatment with HMB on the humerus osteometric and geometrical properties in newborn piglets**

|                                    | Osteometric properties |                     |                    |                   |                    | Geometrical properties |                     |                    |                    |                     |
|------------------------------------|------------------------|---------------------|--------------------|-------------------|--------------------|------------------------|---------------------|--------------------|--------------------|---------------------|
|                                    | Weight, g              | Length, mm          | B, mm              | b, mm             | H, mm              | h, mm                  | A, mm <sup>2</sup>  | MRWT, --           | CI, %              | Ix, mm <sup>4</sup> |
| <b>Main effect supplementation</b> |                        |                     |                    |                   |                    |                        |                     |                    |                    |                     |
| <b>Control</b>                     | 5.09                   | 46.34               | 6.16               | 2.77              | 4.77               | 1.94                   | 19.01               | 1.36               | 57.23              | 55.15               |
| <b>HMB</b>                         | 8.50                   | 55.00               | 7.09               | 2.70              | 5.49               | 2.22                   | 25.99               | 1.63               | 60.74              | 90.97               |
| <b>Main effect sex</b>             |                        |                     |                    |                   |                    |                        |                     |                    |                    |                     |
| <b>Male</b>                        | 7.15                   | 49.62               | 6.60               | 2.63              | 5.10               | 2.09                   | 22.41               | 1.51               | 59.43              | 71.05               |
| <b>Female</b>                      | 6.44                   | 51.72               | 6.65               | 2.85              | 5.16               | 2.07                   | 22.59               | 1.48               | 58.53              | 75.07               |
| <b>Treatment effect</b>            |                        |                     |                    |                   |                    |                        |                     |                    |                    |                     |
| <b>Control male</b>                | 5.03 <sup>a</sup>      | 43.79 <sup>b</sup>  | 5.93 <sup>a</sup>  | 2.68 <sup>a</sup> | 4.68 <sup>a</sup>  | 2.04 <sup>a</sup>      | 17.76 <sup>a</sup>  | 1.28 <sup>a</sup>  | 55.97 <sup>a</sup> | 49.19 <sup>a</sup>  |
| <b>HMB male</b>                    | 9.26 <sup>b</sup>      | 55.46 <sup>a</sup>  | 7.21 <sup>c</sup>  | 2.58 <sup>a</sup> | 5.53 <sup>c</sup>  | 2.13 <sup>a</sup>      | 27.05 <sup>c</sup>  | 1.74 <sup>c</sup>  | 62.89 <sup>b</sup> | 92.91 <sup>b</sup>  |
| <b>Control female</b>              | 5.14 <sup>a</sup>      | 48.90 <sup>ab</sup> | 6.34 <sup>ab</sup> | 2.87 <sup>a</sup> | 4.86 <sup>ab</sup> | 1.83 <sup>a</sup>      | 20.26 <sup>ab</sup> | 1.45 <sup>ab</sup> | 58.97 <sup>a</sup> | 61.10 <sup>a</sup>  |
| <b>HMB female</b>                  | 7.74 <sup>b</sup>      | 54.56 <sup>a</sup>  | 6.96 <sup>bc</sup> | 2.83 <sup>a</sup> | 5.46 <sup>bc</sup> | 2.32 <sup>a</sup>      | 24.92 <sup>bc</sup> | 1.52 <sup>bc</sup> | 58.58 <sup>a</sup> | 89.03 <sup>b</sup>  |
| <b>Pooled SEM</b>                  | 0.53                   | 1.67                | 0.20               | 0.17              | 0.15               | 0.14                   | 1.2                 | 0.06               | 0.87               | 6.27                |
| <b>Main effect and interaction</b> |                        |                     |                    |                   |                    |                        |                     |                    |                    |                     |
| <b>Supplementation</b>             | <0.001                 | <0.001              | <0.001             | 0.701             | <0.001             | 0.066                  | <0.001              | <0.001             | <0.001             | <0.001              |

|                              |       |       |       |       |       |       |       |       |       |       |
|------------------------------|-------|-------|-------|-------|-------|-------|-------|-------|-------|-------|
| <b>Sex</b>                   | 0.261 | 0.234 | 0.793 | 0.220 | 0.728 | 0.938 | 0.885 | 0.688 | 0.322 | 0.566 |
| <b>Supplementation x sex</b> | 0.195 | 0.093 | 0.147 | 0.851 | 0.432 | 0.198 | 0.076 | 0.004 | 0.010 | 0.264 |

248 *a, b, c* - mean values in rows with different letters differ significantly at  $P < 0.05$ ; SEM - standard error of the means.

249 *H*- horizontal external diameter; *h* - horizontal internal diameter; *B* - vertical external diameter; *b* – vertical internal diameter; *A* - cortical

250 cross-sectional area; MRWT - the mean relative wall thickness; *CI* - the cortical index; *I<sub>x</sub>* - secondary moment of inertia .

## Bone mechanical properties

The use of the HMB in the maternal nutrition contributed to a significant increase in ultimate strength and maximal elastic strength in their offspring compared to newborns in the control group. This effect was observed in both sexes (Table 2).

**Table 2. The effect of maternal treatment with HMB on mechanical properties in newborn piglets**

|                                     | Ultimate strength, N | Max. elastic strength, N |
|-------------------------------------|----------------------|--------------------------|
| <b>Main effect supplementation</b>  |                      |                          |
| <b>Control</b>                      | 189.17               | 89.58                    |
| <b>HMB</b>                          | 299.42               | 178.33                   |
| <b>Main effect sex</b>              |                      |                          |
| <b>Male</b>                         | 226.33               | 138.33                   |
| <b>Female</b>                       | 262.25               | 129.58                   |
| <b>Treatment effect</b>             |                      |                          |
| <b>Control male</b>                 | 167.33 <sup>a</sup>  | 88.33 <sup>a</sup>       |
| <b>HMB male</b>                     | 285.33 <sup>bc</sup> | 188.33 <sup>b</sup>      |
| <b>Control female</b>               | 211.00 <sup>ab</sup> | 90.83 <sup>a</sup>       |
| <b>HMB female</b>                   | 313.50 <sup>c</sup>  | 168.33 <sup>b</sup>      |
| <b>Pooled SEM</b>                   | 18.92                | 11.49                    |
| <b>Main effects and interaction</b> |                      |                          |
| <b>Supplementation</b>              | <0.001               | <0.001                   |
| <b>Sex</b>                          | 0.079                | 0.515                    |
| <b>Supplementation x sex</b>        | 0.694                | 0.404                    |

*a, b, c - mean values in rows with different letters differ significantly at  $P < 0.05$ ; SEM - standard error of the means.*

# **Histomorphometry of the proximal humerus epiphysis, metaphysis and BTB**

Histomorphometric analysis of the epiphysis revealed a significantly higher number of trabeculae in females compared to males. Also these differences were observed after HMB treatment. In the case of the relative bone volumes as well as the trabecular space, histomorphometric analysis revealed a significantly lower value of these parameters in females as compared to males. However, in the case of BV/TV in females, supplementation of their mothers during pregnancy contributed to the increase of this parameter. This effect was not observed in males. The size of the trabecular space did not change under the influence of HMB treatment. The trabecular thickness was significantly higher in the males control group compared to males from the experimental group. This effect was not observed in females. Sex also did not affect this parameter (Table 3).

The males from the control group were characterized by higher the BTB than females from the same group. In males there was a significant decrease in the BTB from the HMB group compared to the control group, this effect was not observed in females (Table 3).

Histomorphometric analysis showed that HMB did not affect histomorphometry of the bones in the metaphysis. However, it was observed that females in the control group were characterized by the significantly larger number and volume of trabeculae compared to males in the control group (Table 3).

**Table 3. The effect of maternal treatment with HMB on humerus epiphysis and metaphysis histomrphology in newborn piglets.**

|                                     | Epiphysis           |                    |                              |                              |                                 | Metaphysis          |                     |                              |                              |
|-------------------------------------|---------------------|--------------------|------------------------------|------------------------------|---------------------------------|---------------------|---------------------|------------------------------|------------------------------|
|                                     | Tb. N/mm<br>of bone | BV/TV,<br>%        | Tb.Th<br>mean, $\mu\text{m}$ | Tb.Sp<br>mean, $\mu\text{m}$ | BT.D,<br>$\text{g}/\text{cm}^3$ | Tb. N/mm<br>of bone | BV/TV,<br>%         | Tb.Th<br>mean, $\mu\text{m}$ | Tb.Sp<br>mean, $\mu\text{m}$ |
| <b>Main effect supplementation</b>  |                     |                    |                              |                              |                                 |                     |                     |                              |                              |
| <b>Control</b>                      | 8.29                | 12.48              | 26.53                        | 123.68                       | 2.48                            | 4.69                | 11.53               | 22.83                        | 261.04                       |
| <b>HMB</b>                          | 8.58                | 21.84              | 25.40                        | 119.38                       | 2.22                            | 4.65                | 10.64               | 21.89                        | 285.35                       |
| <b>Main effect sex</b>              |                     |                    |                              |                              |                                 |                     |                     |                              |                              |
| <b>Male</b>                         | 7.05                | 15.73              | 25.99                        | 142.86                       | 2.42                            | 4.22                | 9.36                | 21.90                        | 292.21                       |
| <b>Female</b>                       | 9.82                | 15.60              | 25.91                        | 100.21                       | 2.29                            | 5.13                | 12.81               | 22.82                        | 254.18                       |
| <b>Treatment effect</b>             |                     |                    |                              |                              |                                 |                     |                     |                              |                              |
| <b>Control male</b>                 | 6.85 <sup>a</sup>   | 19.10 <sup>a</sup> | 27.15 <sup>b</sup>           | 143.46 <sup>b</sup>          | 2.61 <sup>b</sup>               | 3.79 <sup>a</sup>   | 8.42 <sup>a</sup>   | 22.04 <sup>a</sup>           | 303.79 <sup>a</sup>          |
| <b>HMB male</b>                     | 7.25 <sup>a</sup>   | 18.01 <sup>a</sup> | 24.83 <sup>a</sup>           | 142.27 <sup>b</sup>          | 2.23 <sup>a</sup>               | 4.64 <sup>ab</sup>  | 10.30 <sup>ab</sup> | 21.76 <sup>a</sup>           | 218.28 <sup>a</sup>          |
| <b>Control female</b>               | 9.72 <sup>b</sup>   | 15.77 <sup>b</sup> | 25.91 <sup>ab</sup>          | 103.92 <sup>a</sup>          | 2.36 <sup>a</sup>               | 5.59 <sup>b</sup>   | 14.64 <sup>b</sup>  | 23.63 <sup>a</sup>           | 280.62 <sup>a</sup>          |
| <b>HMB female</b>                   | 9.91 <sup>b</sup>   | 25.68 <sup>c</sup> | 25.90 <sup>ab</sup>          | 96.51 <sup>a</sup>           | 2.22 <sup>a</sup>               | 4.66 <sup>ab</sup>  | 10.99 <sup>ab</sup> | 22.01 <sup>a</sup>           | 290.07 <sup>a</sup>          |
| <b>Pooled SEM</b>                   | 1.23                | 3.01               | 1.98                         | 27.85                        | 0.12                            | 1.72                | 4.67                | 3.55                         | 125.51                       |
| <b>Main effects and interaction</b> |                     |                    |                              |                              |                                 |                     |                     |                              |                              |
| <b>Supplementation</b>              | 0.366               | <0.001             | 0.029                        | 0.571                        | <0.001                          | 0.930               | 0.471               | 0.317                        | 0.454                        |



|                              |        |        |       |        |       |       |       |       |       |
|------------------------------|--------|--------|-------|--------|-------|-------|-------|-------|-------|
| <b>Sex</b>                   | <0.001 | <0.001 | 0.876 | <0.001 | 0.032 | 0.048 | 0.006 | 0.332 | 0.243 |
| <b>Supplementation x sex</b> | 0.450  | <0.001 | 0.331 | 0.682  | 0.038 | 0.053 | 0.027 | 0.481 | 0.146 |

281 *a, b, c - mean values in rows with different letters differ significantly at  $P < 0.05$ ; SEM - standard error of the means.*

282 *BV/TV – relative bone volume; Tb.Th – trabecular thickness; Tb.Sp – trabecular separation; Tb.N – trabecular number; BTD – bone tissue*

283 *density*

## **Distribution of immature and mature collagen fibers**

In the cortical bone the HMB supplementation of mothers during pregnancy significantly increased the share immature collagen fibers in females. In contrast, in males, maternal supplementation contributed to a decrease in mature collagen fibers. Also, a significant decrease in the ratio of mature to immature fiber collagen was also observed in males (Table 4, Fig 1).

In the epiphysis of the humerus in males from the HMB group, a significant decrease in the share of immature and mature collagen fibers as well as a decrease in their ratio was observed. An increase in the share of immature collagen fibers and a decrease in the ratio of mature to immature collagen in females from the HMB group was observed (Table 4, Fig1).

In the methaphysis in females from the HMB group compared to the control group, an increase in the share of immature collagen fibers and the mature collagen fibers was noted. In males, supplementation with their mothers contributed to a reduction in the content of immature collagen fibers and an increase in the ratio of mature to immature collagen (Table 4, Fig 1).

**Table 4. The effect of maternal treatment with HMB on humerus collagen structure cortical and tubercular bone in newborn piglets**

|                                    | Tubercular bone             |                           |                                               |                             |                           |                                               | Cortical bone               |                           |                                               |
|------------------------------------|-----------------------------|---------------------------|-----------------------------------------------|-----------------------------|---------------------------|-----------------------------------------------|-----------------------------|---------------------------|-----------------------------------------------|
|                                    | Epiphysis                   |                           |                                               | Metaphysis                  |                           |                                               |                             |                           |                                               |
|                                    | Immature collagen fibers, % | Mature collagen fibers, % | The ration of mature to immature collagen, -- | Immature collagen fibers, % | Mature collagen fibers, % | The ration of mature to immature collagen, -- | Immature collagen fibers, % | Mature collagen fibers, % | The ration of mature to immature collagen, -- |
| <b>Main effect supplementation</b> |                             |                           |                                               |                             |                           |                                               |                             |                           |                                               |
| <b>Control</b>                     | 2.25                        | 20.16                     | 8.59                                          | 1.29                        | 5.68                      | 4.37                                          | 2.56                        | 31.14                     | 11.74                                         |
| <b>HMB</b>                         | 2.22                        | 17.53                     | 6.03                                          | 0.76                        | 5.80                      | 4.03                                          | 3.37                        | 27.52                     | 8.74                                          |
| <b>Main effect sex</b>             |                             |                           |                                               |                             |                           |                                               |                             |                           |                                               |
| <b>Male</b>                        | 2.11                        | 18.19                     | 7.53                                          | 1.15                        | 7.29                      | 14.79                                         | 2.75                        | 25.11                     | 9.24                                          |
| <b>Female</b>                      | 2.26                        | 19.50                     | 7.09                                          | 1.27                        | 7.61                      | 6.45                                          | 3.29                        | 33.56                     | 11.17                                         |
| <b>Treatment effect</b>            |                             |                           |                                               |                             |                           |                                               |                             |                           |                                               |
| <b>Control male</b>                | 2.50 <sup>bc</sup>          | 22.03 <sup>a</sup>        | 8.88 <sup>b</sup>                             | 2.04 <sup>d</sup>           | 7.26 <sup>ab</sup>        | 4.36 <sup>a</sup>                             | 2.41 <sup>a</sup>           | 29.52 <sup>a</sup>        | 11.22 <sup>a</sup>                            |
| <b>HMB male</b>                    | 1.72 <sup>a</sup>           | 14.35 <sup>b</sup>        | 6.18 <sup>a</sup>                             | 0.26 <sup>a</sup>           | 7.32 <sup>ab</sup>        | 25.22 <sup>b</sup>                            | 2.09 <sup>ab</sup>          | 20.70 <sup>b</sup>        | 7.26 <sup>b</sup>                             |
| <b>Control female</b>              | 1.99 <sup>ab</sup>          | 18.28 <sup>ab</sup>       | 8.30 <sup>b</sup>                             | 1.01 <sup>b</sup>           | 6.35 <sup>a</sup>         | 6.74 <sup>a</sup>                             | 2.72 <sup>a</sup>           | 32.77 <sup>a</sup>        | 12.14 <sup>a</sup>                            |
| <b>HMB female</b>                  | 2.73 <sup>c</sup>           | 20.72 <sup>a</sup>        | 5.87 <sup>a</sup>                             | 1.52 <sup>c</sup>           | 8.87 <sup>b</sup>         | 6.17 <sup>a</sup>                             | 3.86 <sup>b</sup>           | 34.35 <sup>a</sup>        | 10.21 <sup>ab</sup>                           |

|                                     |         |         |         |         |       |         |        |        |        |
|-------------------------------------|---------|---------|---------|---------|-------|---------|--------|--------|--------|
| <b>Pooled SEM</b>                   | 0.871   | 6.67    | 2.98    | 0.820   | 1.32  | 1.13    | 1.65   | 8.54   | 3,98   |
| <b>Main effects and interaction</b> |         |         |         |         |       |         |        |        |        |
| <b>Supplementation</b>              | 0.864   | 0.019   | <0.0001 | <0.0001 | 0.055 | <0.0001 | <0.001 | 0.023  | <0.001 |
| <b>Sex</b>                          | 0.080   | 0.239   | 0.439   | 0.818   | 0.635 | <0.0001 | 0.039  | <0.000 | 0.024  |
| <b>Supplementation<br/>x sex</b>    | <0.0001 | <0.0001 | 0.812   | <0.0001 | 0.066 | <0.0001 | 0.382  | <0.001 | 0.235  |

300 *a, b, c* - mean values in rows with different letters differ significantly at  $P < 0.05$ ; SEM - standard error of the means.

**Fig 1. Representative images of PSR (Picrosirius red) staining carried out on formaldehyde-fixed fragments sections of the trabecular bone of the humerus metaphysis, epiphysis and the cortical bone of newborn piglets.** Mature collagen fibers are red or orange, while immature collagen fibers are green.

## **Histomorphometry of the growth plate cartilage**

Histomorphometric analysis of growth plate cartilage revealed significantly higher thickness the zone I in male compare to females. The HMB supplementation of females contributed to an increase in the thickness the zone I in comparison to the control group. However, we see the reverse effect in males. In both sexes, the administration of the HMB to the mother during pregnancy led to an increase thickness the zone II, with no differences between the sexes. Although in the control groups males had significantly thicker zone II. The zone III is thicker with both sexes coming from experimental groups. Histomorphometric analysis revealed significantly higher thickness the zone IV in males compared to females and no effect of HMB treatment. There was no significant statistical difference in the total thickness of the growth cartilage between the males in the group, whose mothers were supplemented with the HMB and the thick control. However, a significant increase in this parameter was observed in females from the experimental group compared to the control group. (Table 5).

**Table 5. The effect of maternal treatment with HMB on humerus growth cartilage histomorphology in newborn piglets**

|                                    | Zone I | Zone II | Zone III | Zone IV | Total thickness |
|------------------------------------|--------|---------|----------|---------|-----------------|
| <b>Main effect supplementation</b> |        |         |          |         |                 |
| <b>Control</b>                     | 208.14 | 191.08  | 153.13   | 191.66  | 879.15          |

|                                     |                     |                     |                     |                     |                     |
|-------------------------------------|---------------------|---------------------|---------------------|---------------------|---------------------|
| <b>HMB</b>                          | 208.18              | 238.56              | 203.17              | 185.84              | 918.18              |
| <b>Main effect sex</b>              |                     |                     |                     |                     |                     |
| <b>Male</b>                         | 191.55              | 223.16              | 175.82              | 208.07              | 918.41              |
| <b>Female</b>                       | 225.90              | 206.48              | 180.49              | 169.43              | 878.91              |
| <b>Treatment effect</b>             |                     |                     |                     |                     |                     |
| <b>Control male</b>                 | 218.49 <sup>c</sup> | 200.18 <sup>c</sup> | 153.31 <sup>a</sup> | 207.95 <sup>b</sup> | 942.78 <sup>a</sup> |
| <b>HMB male</b>                     | 164.61 <sup>a</sup> | 246.78 <sup>a</sup> | 200.32 <sup>b</sup> | 208.16 <sup>b</sup> | 894.05 <sup>a</sup> |
| <b>Control female</b>               | 199.87 <sup>b</sup> | 181.97 <sup>b</sup> | 152.96 <sup>a</sup> | 175.37 <sup>a</sup> | 815.52 <sup>b</sup> |
| <b>HMB female</b>                   | 251.67 <sup>d</sup> | 230.34 <sup>a</sup> | 208.02 <sup>b</sup> | 163.49 <sup>a</sup> | 942.30 <sup>a</sup> |
| <b>Pooled SEM</b>                   | 4.38                | 7.14                | 5.15                | 8.09                | 27.3                |
| <b>Main effects and interaction</b> |                     |                     |                     |                     |                     |
| <b>Supplementation</b>              | 0.008               | <0.001              | <0.001              | 0.480               | <0.005              |
| <b>Sex</b>                          | <0.001              | <0.001              | 0.384               | <0.001              | 0.114               |
| <b>Supplementation x sex</b>        | <0.001              | 0.852               | 0.349               | 0.462               | 0.211               |

*a, b, c, d - mean values in rows with different letters differ significantly at  $P < 0.05$ ; SEM - standard error of the means.*

*Zone I - resting zone; Zone II - proliferating zone; Zone III - hypertrophic zone; Zone IV calcium zone.*

## Histomorphometry of the articular cartilage and BTD

In both females and males of mothers who were the HMB supplemented during pregnancy, the thickness of the I zone of the articular cartilage was increased. This effect can also be observed in males in the II zone of this cartilage, while in females the administration of the HMB reduced the thickness of this zone. The administration of the HMB to the mother during pregnancy contributed to the increase in the thickness of the III zone in males, while no effect was seen in females. The total thickness of the articular cartilage was significantly

higher in both sexes of animals from the experimental group as compared to the control group. The effect of the HMB administration during pregnancy was higher in males than in females. Only in the case of the thickness zone I this effect was higher in females. The BTD reduced in the HMB males, whereas in females the differences were not observed. Sex did not affected the HMB for this parameter. (Table 6).

**Table 6. The effect of maternal treatment with HMB on humeral articular cartilage histomorphology and BTD in newborn piglets**

|                                     | Zone I             | Zone II             | Zone III            | Total thickness      | BTD                |
|-------------------------------------|--------------------|---------------------|---------------------|----------------------|--------------------|
| <b>Main effect supplementation</b>  |                    |                     |                     |                      |                    |
| <b>Control</b>                      | 13.95              | 565.96              | 332.78              | 1082.41              | 2.21               |
| <b>HMB</b>                          | 17.88              | 542.65              | 421.67              | 1190.97              | 1.97               |
| <b>Main effect sex</b>              |                    |                     |                     |                      |                    |
| <b>Male</b>                         | 13.97              | 536.71              | 382.03              | 1178.54              | 1.92               |
| <b>Female</b>                       | 17.87              | 571.90              | 372.41              | 1094.84              | 2.01               |
| <b>Treatment effect</b>             |                    |                     |                     |                      |                    |
| <b>Control male</b>                 | 11.60 <sup>b</sup> | 504.68 <sup>a</sup> | 300.98 <sup>b</sup> | 1128.50 <sup>a</sup> | 2.25 <sup>b</sup>  |
| <b>HMB male</b>                     | 16.31 <sup>a</sup> | 568.73 <sup>b</sup> | 463.08 <sup>c</sup> | 1228.57 <sup>c</sup> | 1.78 <sup>a</sup>  |
| <b>Control female</b>               | 16.42 <sup>a</sup> | 627.24 <sup>c</sup> | 364.57 <sup>a</sup> | 1036.31 <sup>b</sup> | 2.01 <sup>ab</sup> |
| <b>HMB female</b>                   | 19.42 <sup>b</sup> | 516.57 <sup>a</sup> | 380.25 <sup>a</sup> | 1153.37 <sup>a</sup> | 1.83 <sup>a</sup>  |
| <b>Pooled SEM</b>                   | 0.65               | 13.53               | 8.83                | 16.92                | 0.07               |
| <b>Main effects and interaction</b> |                    |                     |                     |                      |                    |
| <b>Supplementation</b>              | <0.001             | 0.094               | <0.001              | <0.001               | <0.001             |
| <b>Sex</b>                          | <0.001             | 0.012               | 0.286               | <0.001               | 0.260              |
| <b>Supplementation x sex</b>        | 0.208              | <0.001              | 0.081               | 0.679                | 0.063              |

*a, b, c - mean values in rows with different letters differ significantly at  $P < 0.05$ ; SEM - standard error of the means.*

*Zone I - superficial; Zone II transition zone; Zone III deep zone. BTD – bone tissue density*

## **Vascular endothelial growth factor (VEGF) immunolocalization in the bone trabecula and the growth plate cartilage**

The VEGF staining showed a weak response in the trabecular matrix in both test groups irrespective of sex. Also, the reaction in the cytoplasm of cells was poorly visible, as evidenced by their blue coloration and few cells were dyed brown in all studied groups (Fig 2).

In the case of growth plate cartilage, a response in the matrix in both test groups irrespective of sex compared to the negative control was observed. The strongest reaction in zone IV in all groups was observed. However, compared to other individuals, females from the HMB group had the strongest reaction in zone IV. Irrespective of the group, females were characterized by a stronger reaction in the matrix and the cytoplasm of cartilage cells in zones II and III compared to males (many nuclei and cells stained in brown). In control females, VEGF staining showed a stronger testicular response in the proliferative zone (Fig 3, Fig 4).

**Fig 2. Immunohistochemical analysis of the expression of MMP13 (Matrix metalloproteinase 13), the TIMP2 (Tissue inhibitor of metalloproteinases 2), the VEGF (Vascular endothelial growth factor) and the BMP2 (Bone morphogenetic protein 2) from the humerus trabeculae.** Representative images immunohistochemical analysis carried out on the formaldehyde-fixed from the humerus growth cartilage of newborn piglets. The positive reaction (presence of MMP13, TIMP2, VEGF, BMP2) in the cytoplasm or the cell nucleus was marked in red, while the lack of expression was marked in blue.

**Fig 3. Immunohistochemical analysis of the immunolocalization of MMP13 (Matrix metalloproteinase 13), the TIMP2 (Tissue inhibitor of metalloproteinases 2), the VEGF (Vascular endothelial growth factor) and the BMP2 (Bone morphogenetic protein 2) from the humerus growth plate cartilage.** Representative images immunohistochemical



analysis carried out on the formaldehyde-fixed from the humerus growth cartilage of newborn piglets.

**Fig 4. Immunohistochemical analysis of the immunolocalization the MMP13 (Matrix metalloproteinase 13), the TIMP2 (Tissue inhibitor of metalloproteinases 2), the VEGF (Vascular endothelial growth factor) and the BMP2 (Bone morphogenetic protein 2) from the proliferative zone of growth plate cartilage.** Representative images immunohistochemical analysis carried out on the formaldehyde-fixed from the humerus growth cartilage of newborn piglets. The positive reaction (presence of MMP13, TIMP2, VEGF, BMP2) in the cytoplasm or cell nucleus was marked in red, while the lack of expression was marked in blue.

## **Matrix metalloproteinase 13 (MMP13) immunolocalization in the bone trabecula and the growth plate cartilage**

The MMP13 staining (Fig.) showed a response in the matrix of bone trabecules in all individuals. Also, in the trabecular bone, the presence of MMP13 in the cell cytoplasm in all groups was observed. In the HMB group, expression in cells was similar in both sexes. Whereas in the control group, stronger reactions in males was observed. In males, supplementation did not affect the expression of MMP13 in the cytoplasm of cells. Whereas in females from the HMB group this reaction was stronger than in comparison with females from the control group (Fig 2).

In the case of growth plate cartilage, a response in the matrix in both test groups irrespective of sex compared to the negative control was observed. The strongest reactions on the border of zones III and IV and in zone IV in all groups were observed. However, compared to the control group, the male HMB has a stronger response at the border of these zones, with a smaller expression area of MMP13 at the same time compared to males from the

control group. In females, no such differences between study groups were observed. All groups have reactions in the cytoplasm of cartilaginous cells in zones II and III (brown color of the cytoplasm) while there was no reaction in the cell nuclei (blue). For females in the growth cartilage, stronger responses in the both matrix and the MMP13 expression in the cartilage cell cytoplasm compared to males were observed. Not dependent on supplementation. In both sexes, supplementation resulted in a stronger expression of this protein in the cytoplasm of cartilage cells (Fig 3, Fig 4).

## **Tissue inhibitor of metalloproteinases 2 (TIMP2)**

### **immunolocalization in the bone trabecula and the growth plate cartilage**

The TIMP2 staining showed a response in matrix and bone trabecular cells of all test groups regardless of gender and supplementation (Fig 2).

In the case of growth plate cartilage, a response in the matrix in all studied groups was observed. Stronger response in the zone IV in females from both groups was observed. However, when comparing females from the HMB group to females from the control group, the response in the matrix was stronger in the control group. In the chondrocyte cell membrane, the stronger reaction was in the group in which mothers were not supplemented. In females from the HMB group, TIMP2 expression in the cytoplasm of chondrocytes was weaker compared to the control group. Females from both groups lack expression of the test protein in many cell nuclei. However, comparing both study groups, TIMP2 expression is more pronounced in the group whose mothers were not supplemented with the HMB. Stronger reactions in zones III and IV were also observed in the males from both groups. However, this expression was stronger in the matrix of these zones in control males. They

compared both sexes in the growth plate cartilage matrix with a stronger response in males as well as in the case of the cartilage cell cytoplasm (Fig 3, Fig 4).

## **Bone morphogenetic protein 2 (BMP2) immunolocalization in the bone trabecula and the growth plate cartilage**

The BMP2 staining showed expression of this protein in the matrix of bone trabecules in all tested groups. Comparing both sexes not dependent on supplementation, males were characterized by stronger expression of the tested protein in the matrix. The maternal HMB administration during pregnancy did not significantly affect the BMP2 expression in the bone beam matrix. However, maternal supplementation increased their progeny the BMP2 expression in the cytoplasm of bone beam cells irrespectively of sex (Fig 2).

In the case of the cartilage, staining for BMP2 showed its presence in all animals both in the matrix and in the cytoplasm of cells as well as its absence in the nuclei of the cell. However, in the HMB group, stronger BMP2 expression was observed in the matrix and in the cytoplasm of chondrocytes irrespectively of sex. It should be noted that males, regardless of supplementation, were characterized by a stronger expression of this protein in both cartilage cells and matrix. Strong BMP2 expression in the zone III was observed (Fig 3, Fig 4).

## **Discussion**

Studies conducted in recent years show that disorders during prenatal development may determine the appearance of diseases in adulthood. One of the factors disrupting the normal development of the fetus is inadequate nutrition of the mother during pregnancy [12, 36]. Studies in pigs show that maternal malnutrition leads to the intrauterine growth

restriction of their offspring. The currently available literature also shows that changes in mother's nutrition significantly affect the process of the formation of the skeleton system of their offspring. Human studies show that inadequate maternal nutrition during pregnancy negatively affects the formation of peak bone mass during prenatal fetal development [2].

The nutritional factor used in this experiment is HMB supplementation. In recent years, this supplement has become popular with researchers assessing the impact of changes in maternal nutrition on the prenatal development of their offspring. The use of this supplement during pregnancy contributes to a significant increase in the body weight of newborn organisms and a proportional increase in the mass of internal organs. The same research shows that maternal supplementation affects the development of the femur in newborn animals [17]. In this experiment, the sows were supplemented between 70 and 90 days of pregnancy with HMB at a daily dose of 0.2 g/kg b.w. However, there is no information as to whether this supplement will affect the humerus. Although studies conducted in animal models show that the growth of the humerus is the fastest and slows down much earlier compared to other long bones [1]. Therefore in the presented experiment was justified to use the same dose of this supplement in the same period of pregnancy.

As the animal model used in this study, the pig was used, which is considered to be the best animal model used in particular in preclinical and clinical feeding. These animals are characterized by the greatest similarity to humans in terms anatomical and physiological. In particular, the structure of the digestive tract, cardiovascular, respiratory, immune and urinary systems. Also their internal organs are of similar size and perform similar functions [3].

In the presented study, an increase in humerus weight in newborns was observed caused by the supplementation with HMB of their mothers during pregnancy by 84% in males and by 51% in females, respectively. Regarding the length of the examined humerus, we observed it is increase only in males by 22%. The same effect of HMB supplementation also

allows the observation of the increase in the value of the bone geometric properties only under the influence of the HMB. In males, geometric parameters such as vertical and horizontal external diameters, cross-sectional area, the mean relative wall thickness, the cortical index and the moment of inertia increased by 22%, 18%, 52%, 36%, 12%, 89% respectively. However, in the case of females from the experimental group in relation to the control group, the only geometrical property of the examined bone that has changed is the moment of inertia, which increased by 45%. Changes in bone geometrical properties are associated with changes in their morphology, they are higher in males, which could have contributed to greater changes in these parameters in this sex. In femoral studies of newborn animals whose mothers were supplemented with HMB at the same dose and over the same period of time, the increase in bone mass was proportional for both sexes. In the case of the humerus, the effect of supplementation is not proportional and is higher in males compared to females by 19%. Differences were also observed in geometric parameters such as the cross-sectional area, the mean wall thickness and the cortical index, in which the effect of supplementation was lower in the humerus than in the femur. For both long bones tested, males showed a greater effect on maternal supplementation on geometrical properties. The observed differences between the humerus and femur in HMB groups may be associated with different prenatal development of these bones [1, 17].

Changes in the humeral bone morphology and geometric properties in newborn males from the experimental group improved the mechanical properties of both ultimate strength and maximum elastic strength by 71% and 113%, respectively. In contrast, females from the HMB group had a lower increase in ultimate strength and maximum elastic strength by 49% and 85%, respectively. Both of these forces are significantly higher in males, which is associated with greater changes in the weight, length and geometrical properties of the humerus in this sex. An increase in mechanical properties was also observed in the femur,

where in male ultimate strength and maximum elastic strength increased by 70% and 77,6%, respectively, while in females ultimate strength increased by 33,7%. However, in the case of the humerus we are observed larger changes in mechanical properties compared to the femur [17].

In the presented work, we also examined the effect of mother's supplementation during pregnancy on the collagen structure of the cortical bone. Changes in collagen structure can contribute to changes in their ability to resist the force affecting the skeleton. In males, under the influence of the supplementation, a decrease in the share of mature collagen fibers and a ratio of mature to immature collagen was observed by 43% and 55%, respectively. In contrast, in the HMB females group was only the immature collagen fibers 42% increase observed. The results showed that sex significantly influenced the effect of supplementation because such differences were not observed between the sexes in the control group. Changes in the collagen structure of the cortical bone may have contributed to the appearance of changes in the examined mechanical properties of the humerus. Immature collagen fibers undergo the maturation process and is less mineralized than the mature collagen fibers [33]. We observed the increase in the share of immature collagen fibers in the examined females and a decrease in the content of mature collagen fibers in males. This could have contributed to changes in individual mechanical parameters of the humerus under the influence of HMB supplementation.

Histomorphometric analysis of trabecular bone showed that maternal supplementation only significantly increased BV/TV in females by 63%, and in males reduced bone thickness by 9% at the humerus epiphysis. However, no changes in trabecular bone histomorphometry were observed in the humerus metaphysis. In prenatal femoral studies, maternal supplementation during pregnancy contributed to major changes in trabecular bone histomorphometry at both the metaphysis and the epiphysis. Where in the femoral epiphysis

an increase in the number of bone trabeculae was observed only in males. Other parameters such as BV/TV, thickness of bone trabeculae in both sexes increased significantly while the size of the trabecular space decreased. On the other hand, in the femoral metaphysis, changes in trabecular bone histomorphometry was observed only in female [17]. The observed differences between the two long bones may be due to different development during fetal life [1]. It should be noted that the changes in the trabecular histomorphometry of the humerus are much smaller than in the case of the femur. This may be due to the fact that the bone develops earlier than the femur and was less intense at the time supplementation began.

On the other hand, we were observing changes in the collagen structure of the trabecula bone the epiphysis and the metaphysis. In the HMB males group at the epiphysis decrease in the share of immature and mature collagen fibers was observed, which contributed to a decrease in their ratio compared to the control group by 45%, 54% and 44%, respectively. In the HMB females group, only a 37% increase in the immature collagen fibers was observed. In the metaphysis of the HMB males, the share of the immature collagen fibers was reduced by 62%, while there was no change in the share of the mature collagen fibers, which contributed to an increase in the ratio of these collagens by 33%. In females in the metaphysis, maternal supplementation increased the proportion of the immature and mature collagen fibers by 50% and 40%, respectively. These changes show an increase in the intensity of bone tissue remodeling processes due to the supplementation of their mothers during pregnancy.

Under the influence of the female supplementation during pregnancy, changes in the articular and the growth plate cartilage were also observed. Concerning the articular cartilage in males from the experimental group, an increase in the thickness of all zones was observed, i.e., I, II and III, respectively, by 41%, 13%, 54% in relation to the control group, which was subjected to an increase in the total thickness of articular cartilage in this experimental group

by 9%. In the case of females from the HMB group, we observed an increase in the thickness of the zone I, II and the total thickness of the articular cartilage by 19%, 18%, and 11% in relation to the females from the control group. HMB supplementation also affected BTD, but only in males, which was significantly lower by 21% compared to the control group. These changes may affect functions that individual zones of this cartilage perform. [37, 38]. Changes in the thickness of individual zones can affect the functions of articular cartilage, but it should be noted that the increase in thickness of individual zones is not proportional when comparing each of them with each other in both sex, which can influence relations between particular zones and affect their functions.

In the case of the growth plate cartilage, we also observed changes in both experimental groups. In females of this group we observed an increase in the thickness of zones I, II, III in a total of 15%, 27%, 36%, 16%, respectively. In males, the thickening under the influence of the HMB was seen in zones II, III by 23% and 31%, with a decrease in the thickness of the zone I by 25%, and a lack of changes in relation to the control group in the total thickness of the articular cartilage. In the case of these measurements, we see that the HMB had a greater impact in females. In the articular cartilage the individual zone size changes may affect the proper functioning of the entire growth plate cartilage, which is the growth plate, and contributes to the bone growth as a result of the cartilage ossification [39].

Changes that we observed may be the cause of the effect of the tested supplement on the body's hormonal balance, as confirmed by the results obtained by Blicharski et al. [17]. In this work was showed that HMB affects the concentration of IGF-1, leptin and sex hormones, contributing to the increase in the content of these hormones in the blood serum. There were differences between both sexes, which can be explained in the case of the humerus by the combination of the effect of HMB supplementation with the effect of sex observed in this work.



Changes in the hormonal balance could also affect the changes in the protein structure of cartilage and bone tissue. In the presented study, these changes were verified by examining the expression of proteins in the immune reaction. In our work, we examined the MMP13, TIMP2, VEGF and BMP2 expressions.

Maintaining the proper relationship between osteolytic and osteogenetic processes significantly affects the correct formation of the skeletal system. Normal bone and cartilage resorption is affected by maintaining a balance between MMP13 and TIMP2. Proteins from the MMP group are responsible for resorption processes of tissue matrix components. In contrast, proteins from the TIMP group that inhibit the effects of MMPs. The MMP group includes 14 proteins that have been divided according to their structure and function. Lack of certain proteins from this group, including MMP13 (collagenase 3) during embryonic development, has a negative effect on the formation of growth plates, which impairs bone development and growth [40]. The TIMP family includes 4 proteins that differ in terms of expression, regulation as well as the ability to interact with a given metalloproteinase found in a tissue matrix in a latent form [41]. Therefore, in this study it was examined whether the changed nutrition of mothers during pregnancy affects the expression of metalloproteinases, especially MMP13 in bone and cartilage tissue of newborn animals as well as its TIMP2 inhibitor.

In the presented work, HMB supplementation of mothers during pregnancy significantly influenced the expression of both MMP13 and TIMP2. In the trabecular bone, changes in MMP13 expression are observed only in females, where supplementation contributed to increased expression of this protein. However, in the case of the administration of the growth plate in the mother during pregnancy HMB increased expression of this protein in the cytoplasm of chondrocytes their offspring irrespective of sex. In all examined groups,

MMP13 expression in the bone tissue matrix was the strongest on the border of zones III and IV.

Studies in animal models show that mice in which the gene encoding the MMP13 has been deleted created disturbances in the bone and the cartilage tissue homeostasis with no change in their life expectancy and fertility compared to the control group. In individuals deprived of MMP13, disorders in the growth plate were found as a result of changes in the thickness of the hypertrophic zone and no change in the thickness of the other zones, which caused an increase the number of trabecular bone in the absence of regularity in their arrangement, and disorders in their proper ossification, contributing to weakening their strength and increasing risk of fracture over the length. At the same time, these changes did not affect bone length [42, 43].

MMP13 affects the degradation of collagen fibers, mainly type II but also type I, which build support tissues. Changes in the expression of this protein as a result of maternal supplementation can also be combined with analysis of trabecular bone collagen structure, where changes were observed under the influence of HMB supplementation [43, 44].

In the results obtained in this study, it was observed that in the control group, TIMP2 expression is significantly stronger than the immunological reaction, we obtained in the experimental group in both cartilage and trabecular tissue, which may indicate an increase in resorption processes in these tissues under the influence of HMB. This can also be confirmed by the fact that MMP13 expression is stronger in the HMB supplemented group in both cartilage and trabecular bone. Research conducted in recent years shows that reduced TIMP levels contribute to increased bone resorption through stronger expression of metalloproteinases [45]. What we see in the presented work.

Research conducted over the years shows that the expression of MMP13 is not only correlated with the expression of proteins from the TIMP group but also among others with

BMP2 [46]. BMP2, the second type of bone morphogenetic protein, plays an important role in the formation of both the bone and the cartilage tissue. It is a protein that stimulates the formation of new bone tissue during bone remodeling [24, 25]. It is released during collagen degradation and stimulates its reconstruction. Research conducted by Johansson et al. [1997] shows that the BMP2 protein not only stimulates the formation of type II collagen, but also significantly inhibits the action of collagenase 3 [46].

In this work, we can see that the BMP2 protein expression is stronger in the experimental group compared to the control group. It should be noted that males, regardless of supplementation, were characterized by a stronger expression of this protein in both cartilage cells and matrix, especially, stronger BMP2 expression in zone III was observed. The obtained results may suggest that bone formation processes occur much faster in animals whose mothers were supplemented with the HMB during pregnancy.

Increased expression of both BMP2, which inhibits the action of MMP13 and contributes to the increased synthesis of collagen fibers, as well as collagenase 3 degrading collagen fibers in bone and cartilage tissue in the offspring of mothers supplemented with HMB during pregnancy may suggest that osteolytic as well as osteogenetic processes occur much faster in these newborns as a result of maternal supplementation. It should also be noted that the expression of the TIMP2 metalloproteinase inhibitor is weaker in the experimental groups, which may also confirm the fact of increased remodeling processes of supporting tissues in these animals.

Studies using BMP2 have shown that its activity is highest during endochondral bone development, because it affects the proliferation and maturation of cartilage cells. Studies in animal models show that the lack of BMP2 negatively affects the development of the skeletal system, which is associated with disorders in the growth plate. The hypertrophic zone in the course of growth is very important because in this part the blood vessels enter into the growth

plate, stimulating the growth of bone cells, their ossification and the formation of a new matrix [47]. The appearance of blood vessels stimulates bone cells and other cells for production the right amount of growth factor, which is VEGF [48]. The VEGF, or the endothelial growth factor, which plays a very important role in the endochondral bone development. Research conducted by Carlevaro et al in 2000 proved that the highest VEGF expression is observed in the hypertrophic zone and stimulates bone growth in length [48-50].

In this studies all animals, irrespective of group and sex, VEGF was found in the matrix and nuclei of cartilage cells in the II and III growth cartilage zones. The highest expression of this protein was observed at the border of zones III and IV, which may confirm that this factor stimulates intra-cartilaginous growth. The strongest expression of this protein at the border of the hypertrophic and the calcifying zone can be observed in the HMB females, which may indicate the effect of both supplementation and sex on the VEGF expression, because the same effect is not observed in males. On the other hands larger changes in osteometric parameters under the influence of the HMB are visible in males. Result could be associated with the greater BMP2 expression in this sex.

There is no research on the effect of HMB on the expression of MMP13, TIMP2, BMP2 and VEGF in the literature.

It should be noted that proteins identified in this study were characterized by strong expression in zones II and III and on the border of zones III and IV of growth plate cartilage, which can also confirm that these proteins affect the process of bone growth in length. As well as the results obtained, they show that changes in maternal nutrition affect the expression of MMP13, TIMP2, BMP2 and VEGF in the bone and cartilage tissue of their newborn offspring, which may contribute to changes in the development of their skeletal system [2].

Maintaining balance in osteolytic and osteogenic processes makes the proper bone tissue homeostasis and proper growth of this bone tissue [51]. The obtained results suggest

that the bone remodeling processes are significantly more intensive in the experimental group compared to the control group. What can be combined with the previously studies where mass and length of the femur bone, are significantly higher in animals from the experimental group [17]. We also observed changes in the thickness of both the articular and the growth cartilage, which can be associated with changes in the expression of proteins MMP13, TIMP2, BMP2 and VEGF.

To summarize there is no research in the available literature answering the question whether HMB supplementation of females during pregnancy affects the development of prenatal humerus bone. The comparison of the results obtained of this work in relation to the changes caused by the HMB supplementation on the prenatal development of the femur gives the view that the humerus bone responds in a different way to changes in mother's nutrition, which may be due to the fact that the prenatal development of both bones is different. It should also be noted that checked whether the effect of femoral changes under the influence of HMB persists later in life as well [16]. Therefore, further researches in this area should also be carried out to verify if these changes are equally observable in the humerus. Another aspect of our work that was not previously used in assessing the impact of maternal supplementation on prenatal development of the skeletal system of their offspring, was the study of the protein expression (TIMP2 MMP13, VEGF, BMP2). These proteins, in studies assessing the impact of adequate nutrition of mothers on the development of their offspring, can be an excellent markes of the intensity of osteogenic and osteolytic in both the cartilage and the bone tissue. Our research may be an introduction to the further research on the similarity between the femur and the humerus in regard to their changes during prenatal development and adaptations to changed conditions.

# Literature

1. Patton JT, Kaufman MH. The timing of ossification of the limb bones, and growth rates of various long bones of the fore and hind limbs of the prenatal and early postnatal laboratory mouse. *J Anat.* 1995;186 ( Pt 1)(Pt 1):175-185.
2. Williams EL, Nicholas C Harvey NC, Dennison EM, Edwards ChC, Cooper C. Maternal nutrition and bone health in the offspring. *Int. J Clin Rheumatol.* 2009;4(2): 133–145.
3. Gutierrez K, Dicks N, Glanzner WG, Agellon LB, Bordignon V. Efficacy of the porcine species in biomedical research. *Front. Genet.*, 2015;6: 293. Available from: <https://www.frontiersin.org/articles/10.3389/fgene.2015.00293/full>.
4. Seckl JR: Glucocorticoids, feto-placental 11 beta-hydroxysteroid dehydrogenase type 2, and the early life origins of adult disease. *Steroids.* 1997;62: 89-94.
5. Śliwa E, Kowalik S, Tatara MR, Krupski W, Majcher P, Luszczewska-Sierakowska I, et al.: Effect of alpha-ketoglutarate (AKG) given to pregnant sows on development of humerus and femur in newborns. *Bull Vet Inst Pulawy.* 2005;49: 117-120.
6. Tatara MR, Śliwa E, Krupski W: Prenatal programming of skeletal development in the offspring: effects of maternal treatment with  $\beta$ -hydroxy- $\beta$ -methylbutyrate (HMB) on femur properties in pigs at slaughter age. *Bone.* 2007;40: 1615-1622.
7. Smith NH, Ozanne SE: Intrauterine origins of metabolic disease. *Rev Gynaecol Perinat Practice.* 2006;6: 211-217.
8. Mantila Roosa SM, Hurd AL, Xu H, Fuchs RK, Warden SJ: Age-related changes in proximal humerus bone health in healthy, white males. *Osteoporos Int.* 2012;23: 2775-2783.
9. Nissen S, Abumrad NN: Nutritional role of the leucine metabolite  $\beta$ -hydroxy- $\beta$ -methylbutyrate (HMB). *J Nutr Biochemia.* 1997;8: 300-311.

10. Nissen S, Fuller JCJr, Sell J, Ferket PR, Rives DV: The effect of  $\beta$ -hydroxy- $\beta$ -methylbutyrate on growth, mortality, carcass quality of broiler chickens. Poult Sci. 1994;73: 137–155.
11. Tako E, Ferket PR, Uni Z: Effects of in ovo feeding of carbohydrates and  $\beta$ -hydroxy- $\beta$ -methylbutyrate on the development of chicken intestine. Poult Sci. 2004;83: 2023–2028.
12. Nissen S, Sharp R L, Panton L, Vukovich M, Trappe S, Fuller JrJC: Beta-hydroxy-methylbutyrate (HMB) supplementation in humans is safe and decrease cardiovascular risk factors. J Nutr. 2000;130(8): 1937-1945.
13. Cieřlak D, Zarobkiewicz M Nieradko-Iwanicka B.  $\beta$ -Hydroxy- $\beta$ -methylbutyrate (HMB) supplementation in prevention and treatment of elderly sarcopenia. J Educ Health Sport 2018;8(10): 41-49.
14. Tataru MR: Neonatal programming of skeletal development in sheep is mediated by somatotrophic axis function. Experimental Physiology. 2008;93: 763-772.
15. Tataru MR: Effect of  $\beta$ -hydroxy- $\beta$ -methylbutyrate (HMB) administration on volumetric bone mineral density, and morphometric and mechanical properties of tibia in male turkeys. J Anim Physiol Anim Nutr (Berl). 2009;93(6): 669-677.
16. Tomaszewska E, Muszyński S, Dobrowolski P, Więcek D, Tomczyk-Warunek A, Świetlicka I, Pierzynowski S G: Maternal HMB treatment affects bone and hyaline cartilage development in their weaned piglets via the leptin/osteoprotegerin system. J Anim Physiol Anim Nutr (Berl). 2019;103(2): 626-643.
17. Blicharski T, Tomaszewska E, Dobrowolski P, Hulaś-Stasiak M, Muszyński S: A metabolite of leucine ( $\beta$ -hydroxy- $\beta$ -methylbutyrate) given to sows during pregnancy alters bone development of their newborn offspring by hormonal modulation. PLoS ONE. 2017;12(6): e0179693.

18. Świetlicka I, Muszyński S, Tomaszewska E, Dobrowolski P, Kwaśniewska A, Świetlicki M, Skic A, Gołacki K: Prenatally administered HMB modifies the enamel surface roughness in spiny mice offspring: An atomic force microscopy study. Arch Oral Biol. 2016; 70: 24-31.
19. Tomaszewska E, Dobrowolski P, Świetlicka I, Muszyński S, Kostro K, Jakubczak A, Taszkun I, Żmuda A, Rycerz K, Blicharski T, Jaworska-Adamu J: Effects of maternal treatment with  $\beta$ -hydroxy- $\beta$ -metylbutyrate and 2-oxoglutaric acid on femur development in offspring of minks of the standard dark brown type. J Anim Physiol An N. 2018;102: 299-308.
20. Rycerz K, Krawczyk A, Jaworska-Adamu J, Szalak R, Tomaszewska E, Dobrowolski P: Influence of oral administration of HMB to pregnant dams on calbindin expression in the dentate gyrus of the hippocampus during postnatal development in spiny mice offspring. Vet Med-Sci and Pract. 2017;6: 341-345.
21. Young BE, McNanley TJ, Cooper EM, et al. Maternal vitamin D status and calcium intake interact to affect fetal skeletal growth in utero in pregnant adolescents. Am J Clin Nutr. 2012;95(5): 1103-1112.
22. Masih Ch, Francis A, Shriwastava A, Diwedi N, Tiwari P, Nareliya R, Kumar V: Biomechanical evaluation of human humerus and scapula bone: a review. Journal of Biomedical and Bioengineering. 2012;3(1): 63-66.
23. Liu Y, Olsen B R: Distinct VEGF Functions During Bone Developmentand Homeostasis. Arch. Immunol Ther Exp. 2014;62: 363-368.
24. Kochanowska I, Chaberek S, Wojtowicz S, Marczyński B, Włodarski K, Dytko M, Ostrowski K: Expression of genes for bone morphogenetic proteins BMP-2, BMP-4 and BMP-6 in various parts of the human skeleton. BMC Musculoskel Dis. 2007;8(128): 1-10.



25. Shu B, Zhang M, Xie R, Wang M, Jin H, Hou W, Tang D, Harris SE, Mishina Y, O'Keefe RJ, Hilton MJ, Wang Y, Chen D: BMP2, but not BMP4, is crucial for chondrocyte proliferation and maturation during endochondral bone development. *J Cell Sci.* 2011;124(Pt 20): 3428-3440.
26. Grässel S, Beckmann J, Rath B, Vogel M, Grifka J, Tingart M: Expression profile of matrix metalloproteinase-2 and -9 and their endogenous tissue inhibitors in osteonecrotic femoral heads. *International Journal of Molecular Medicine.* 2010;26: 127-133.
27. Hułas-Stasiak M, Jakubowicz-Gil J, Dobrowolski P, Tomaszewska E, Muszyński S. Maternal  $\beta$ -hydroxy- $\beta$ -methylbutyrate (HMB) supplementation during pregnancy affects early folliculogenesis in the ovary of newborn piglets. *Theriogenology.* 2019;128: 91-100.
28. Tomaszewska E, Dobrowolski P. Maternal glucocorticoid treatment as a model for examining foetal gender-specific effects on the development that influences the bone metabolism of neonatal piglets. *Bull Vet Inst Pulawy.* 2012;56: 247-253.
29. Muszyński S, Kwiecień M, Tomaszewska E, Świetlicka I, Dobrowolski P, Kasperek K, Jeżewska-Witkowska G: Effect of caponization on performance and quality characteristics of long bones in Polbar chickens. *Poult Sci.* 2017;96: 491–500.
30. Tomaszewska E, Dobrowolski P, Puzio I: Morphological changes of the cartilage and bone in newborn piglets evoked by experimentally induced glucocorticoid excess during pregnancy. *J Anim Physiol Anim Nutr (Berl).* 2013;97: 785-796.
31. Suvara SK, Layton C, Bancroft JD: Bancroft's theory and practice of histological techniques. 7th ed., Edinburgh: Churchill Livingstone; 2013.
32. Dobrowolski P, Tomaszewska E, Kurlak P, Pierzynowski SG: Dietary 2-oxoglutarate mitigates gastrectomy-evoked structural changes in cartilage of female rats. *Exp Biol Med.* 2016;241: 14-24.

33. Muszyński S, Tomaszewska E, Dobrowolski P, Kwiecień M, Wiącek D, Świetlicka I, et al: Analysis of bone osteometry, mineralization, mechanical and histomorphometrical properties of tibiotarsus in broiler chickens demonstrates a influence of dietary chickpea seeds (*Cicer arietinum* L.) inclusion as a primary protein source. PLoS ONE. 2018;13(12): e0208921.
34. Tomaszewska E, Dobrowolski P, Bieńko M, Prost Ł, Szymańczyk S, Zdybel A: Effects of 2-oxoglutaric acid on bone morphometry, densitometry, mechanics, and immunohistochemistry in 9-month-old boars with prenatal dexamethasone-induced osteopenia. Connect Tissue Res. 2015;56: 483-492.
35. Tomaszewska E, Dobrowolski P, Wydrych J: Postnatal administration of 2-oxoglutaric acid improves articular and growth plate cartilages and bone tissue morphology in pigs prenatally treated with dexamethasone. J Physiol Pharmacol. 2012;63: 547-554.
36. Dammann O, Matthews SG: Glucocorticoid therapy in the fetus and newborn-introduction. Semin in Neon. 2001;6: 283-284.
37. Sophia Fox AJ, Bedi A, Rodeo SA: The Basic Science of Articular Cartilage: Structure, Composition, and Function. Sports Health. 2009;1(6): 461-468.
38. Poole AR, Kojima T, Yasuda T, Mwale F, Kobayashi M, Lavery S: Composition and Structure of Articular Cartilage: A Template for Tissue Repair. Clin Orthop Relat Res. 2001;391(Suppl): 26-33.
39. Hunziker E: Mechanism of longitudinal bone growth and its regulation by growth plate chondrocytes. Microsc Res Tech. 1994;28: 505-551.
40. Tokuhara CK, Santesso MR, de Oliveira DSN, da Silva Ventura TM, Doyama JT, Zambuzzi WF, de Oliveira RC. Updating the role of matrix metalloproteinases in mineralized tissue and related diseases. J Appl Oral Sci. 2019;27:e20180596.

41. Deng X, He G, Levine A, Cao Y, Mullins C. Adenovirus-mediated expression of TIMP-1 and TIMP-2 in bone inhibits osteolytic degradation by human prostate cancer. *Int J Cancer*. 2008;122: 209–218.
42. Inada M, Wang Y, Byrne M H, Rahman MU, Miyaura C, López-Otín C, Krane SM: Critical roles for collagenase-3 (MMP13) in development of growth plate cartilage and in endochondral ossification. *Proc Natl Acad Sci USA*. 2004;101(49): 17192-17197.
43. Sasano Y, Zhu JX, Tsubota M, Takahashi I, Onodera K, Mizoguchi I, Kagayama M: Gene expression of MMP8 and MMP13 during embryonic development of bone and cartilage in the rat mandible and hind limb. *J Histochem Cytochem*. 2002;50(3): 325-332.
44. Inada M, Wang Y, Byrne MH, Rahman MU, Miyaura C, López-Otín C, Krane SM. Critical roles for collagenase-3 (MMP13) in development of growth plate cartilage and in endochondral ossification. *Proc Natl Acad Sci U S A*. 2004;101(49): 17192-17197.
45. Sobue T, Hakeda Y, Kobayashi Y, Hayakawa H, Yamashita K, Aoki T, Kumegawa M, Noguchi T, Hayakawa T. Tissue inhibitor of metalloproteinases 1 and 2 directly stimulate the bone-resorbing activity of isolated mature osteoclasts. *J Bone Miner Res*. 2001;16(12): 2205-2214.
46. Johansson N, Saarialho-Kere U, Airola K, Herva R, Nissinen L, Westermarck J, Vuorio, Heino J, Kahari VM. Osteoblasts during human fetal bone development. *Developmental Dynamics*. 1997;208: 387–397.
47. Pan Q., Yu Y., Chen Q., Li C., Wu H., Wan Y., Ma J., Sun F. Sox9, a key transcription factor of bone morphogenetic protein–2–induced chondrogenesis, is activated through BMP pathway and a CCAAT box in the proximal promoter. *J Cell Physiol*. 2008;217: 228-241.
48. Hu K, Olsen BR. Osteoblast–derived VEGF regulates osteoblast differentiation and bone formation during bone repair. *J Clin Invest*. 2006;26: 509-526.

49. Carlavaro MF, Cermelil S, Cancedda R, Descalzi Cancedda F: Vascular endothelial growth factor (VEGF) in cartilage neovascularization and chondrocyte differentiation: auto-paracrine role during endochondral bone formation. J Cell Sci. 2000;112: 59-69.
50. Murata M, Yudoh K, Masuko K: Review The potential role of vascular endothelial growth factor (VEGF) in cartilage. How the angiogenic factor could be involved in the pathogenesis of osteoarthritis? Osteoarthritis Cartilage. 2008;16: 279-286.
51. Hadjidakis D J, Androulakis I I: Bone Remodeling Ann. N.Y. Acad. Sci. 2006;1092: 385-396.



Male HMB

Female HMB

Male Control

Female Control

Metaphysis

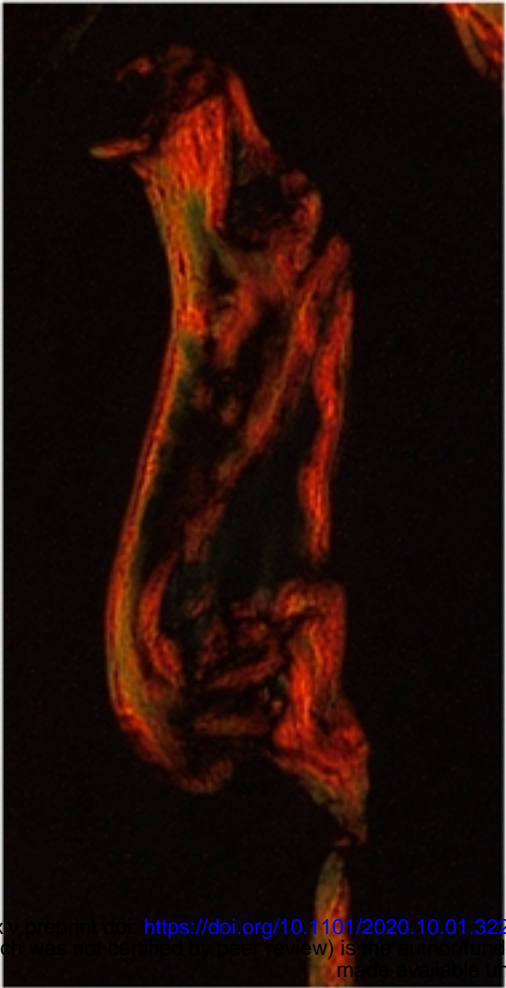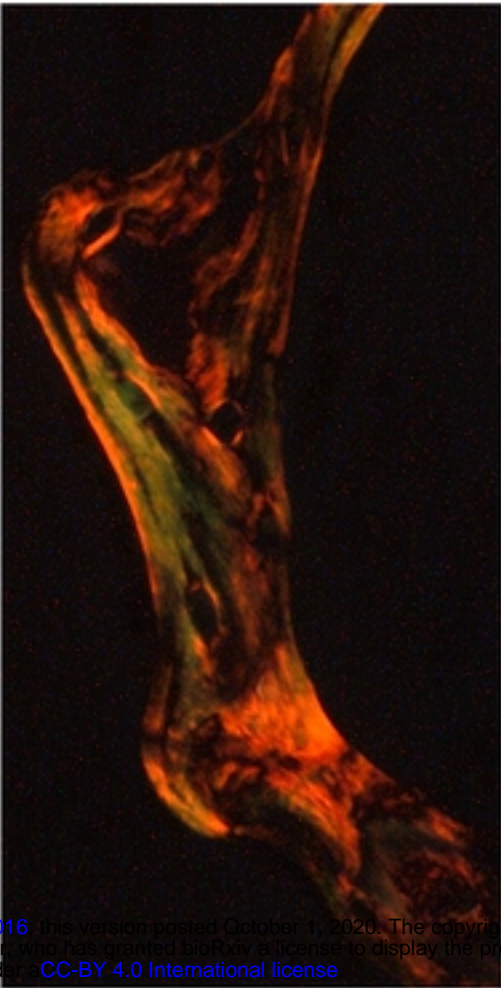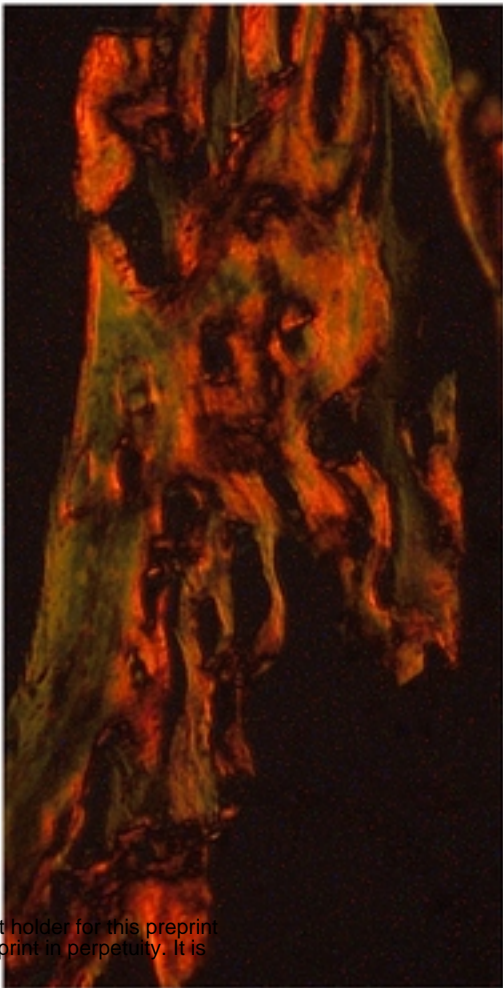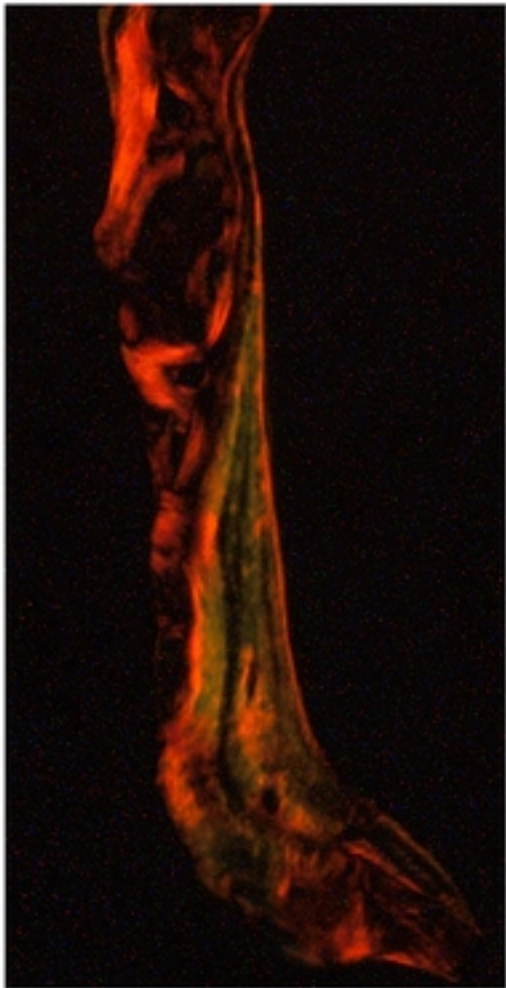

Epiphysis

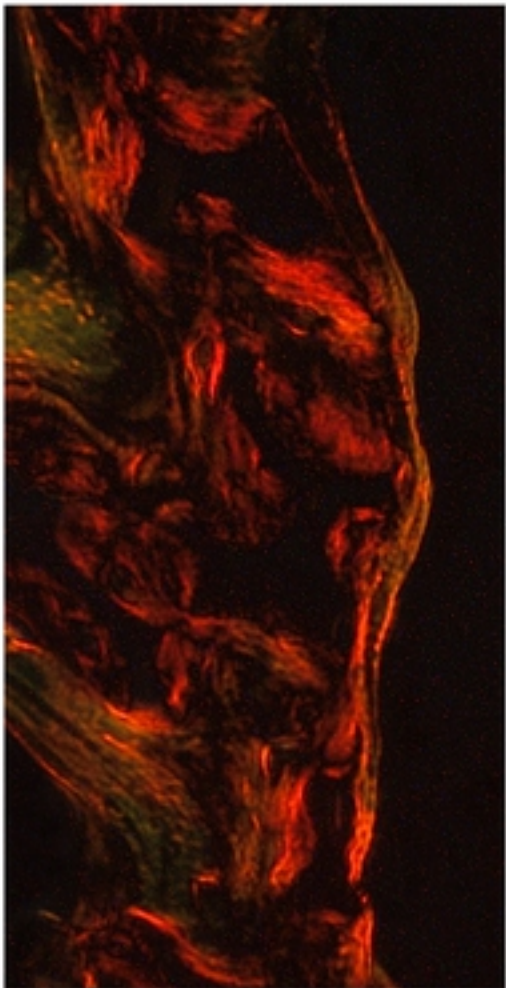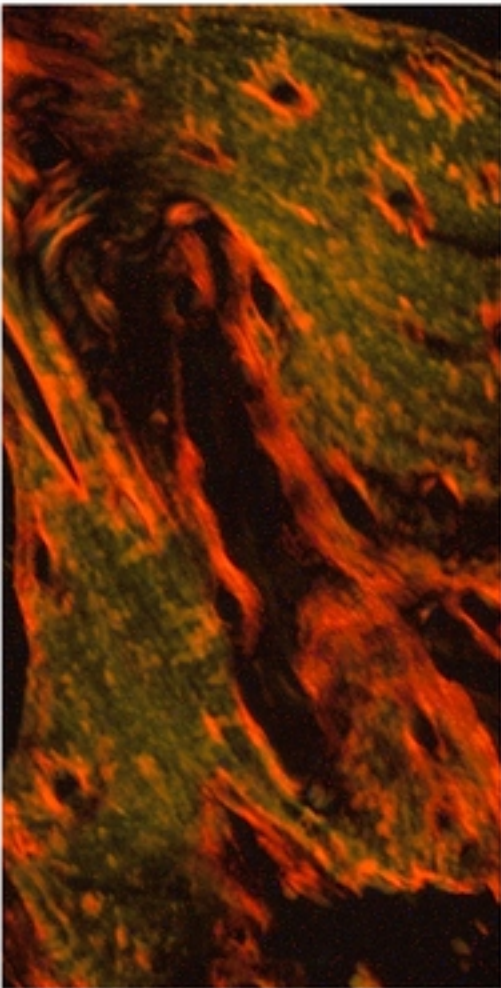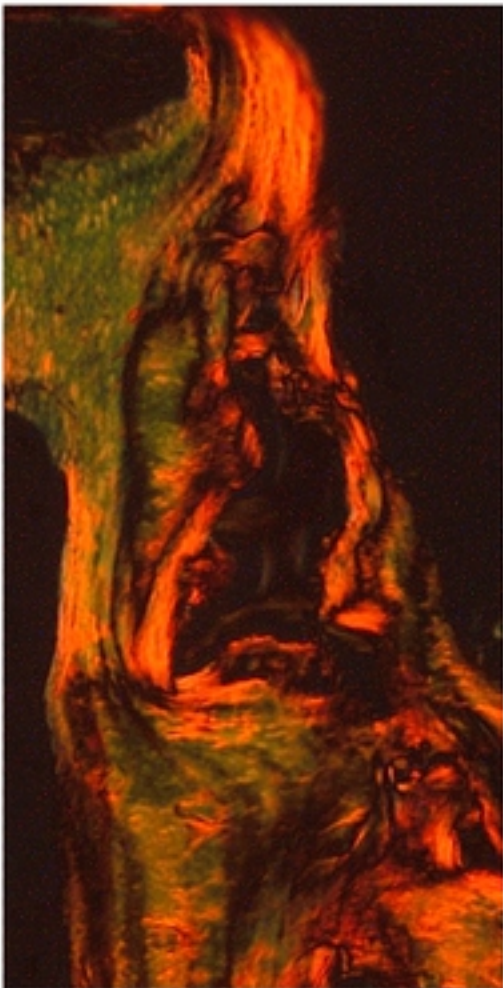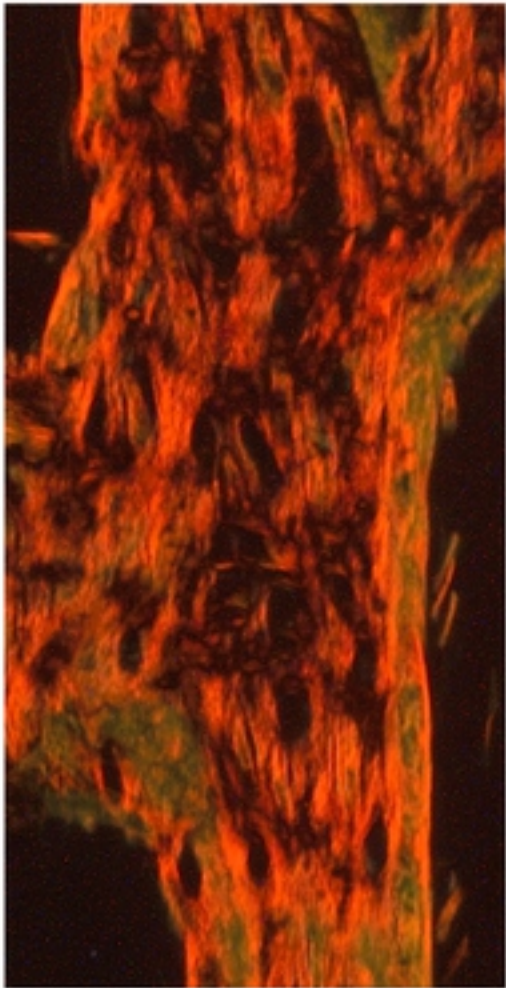

Cortical Bone

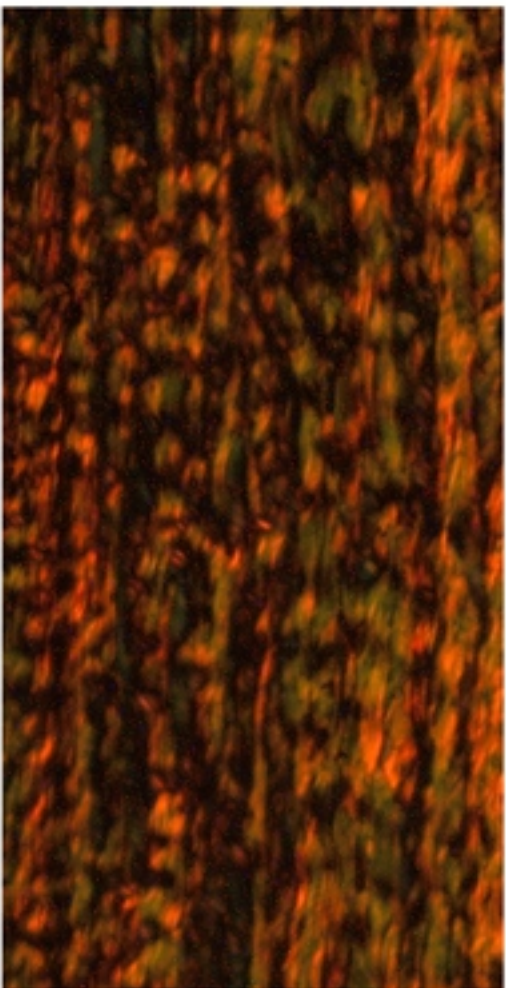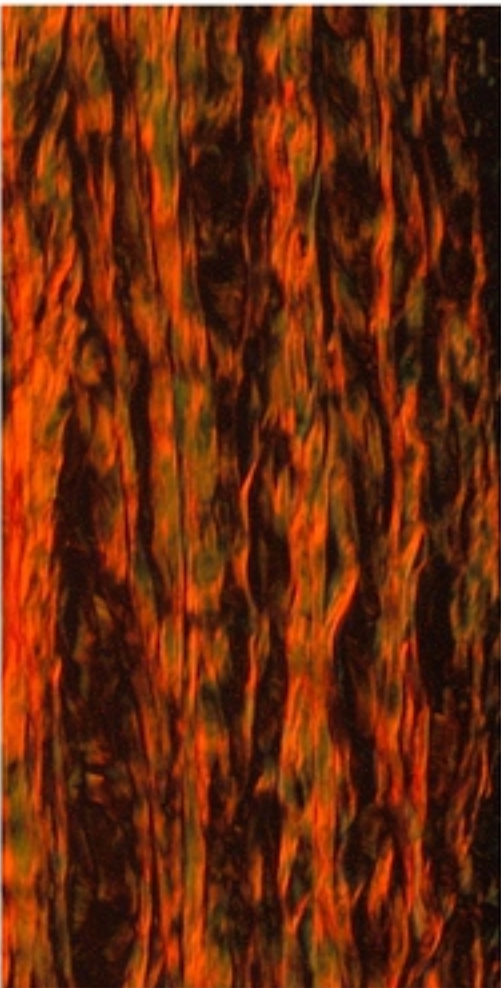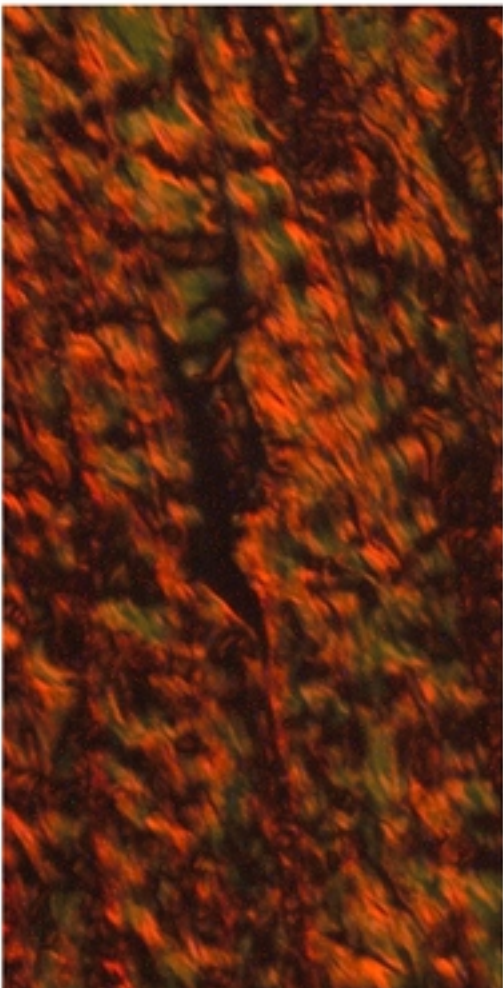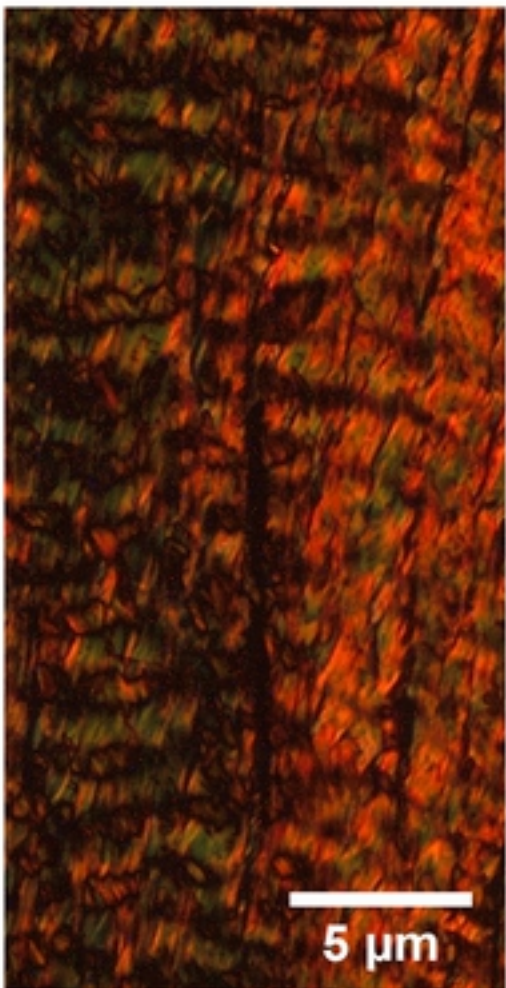

Figure



Male HMB

Female HMB

Male Control

Female Control

MMP 13

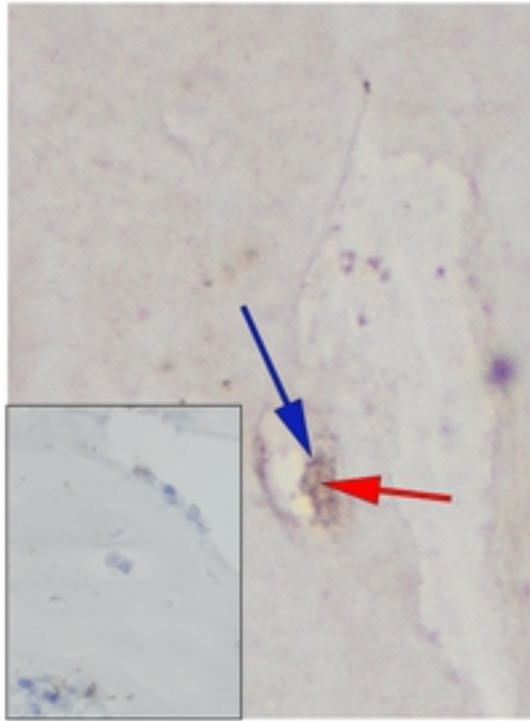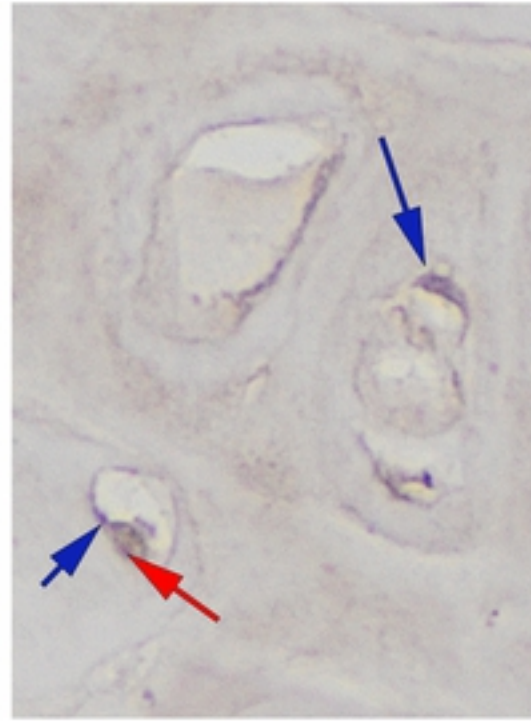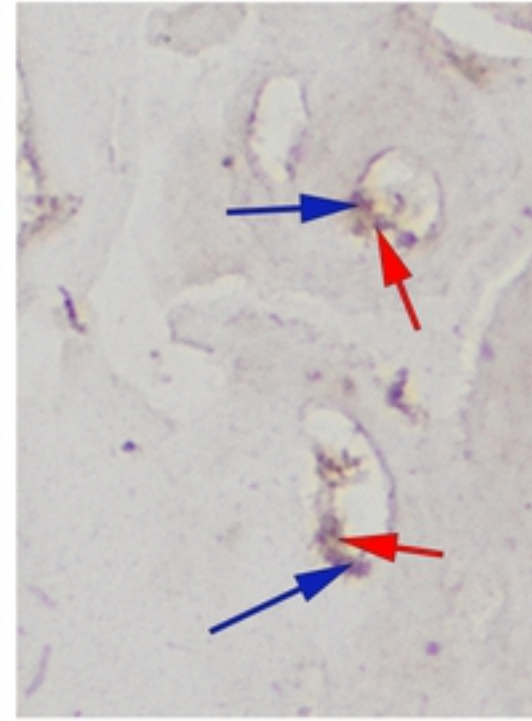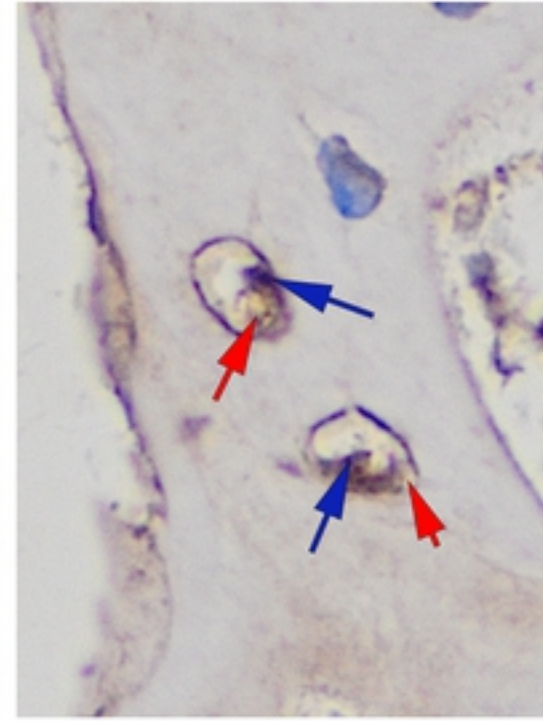

bioRxiv preprint doi: <https://doi.org/10.1101/2020.10.01.322016>; this version posted October 1, 2020. The copyright holder for this preprint (which was not certified by peer review) is the author/funder, who has granted bioRxiv a license to display the preprint in perpetuity. It is made available under aCC-BY 4.0 International license.

TIMP 2

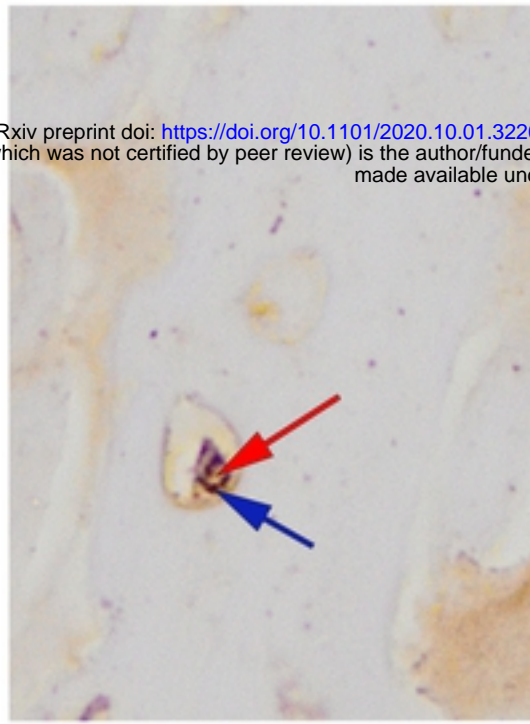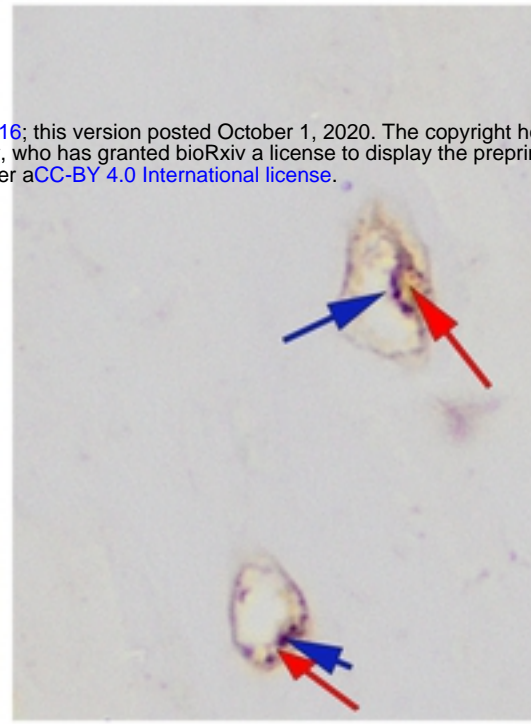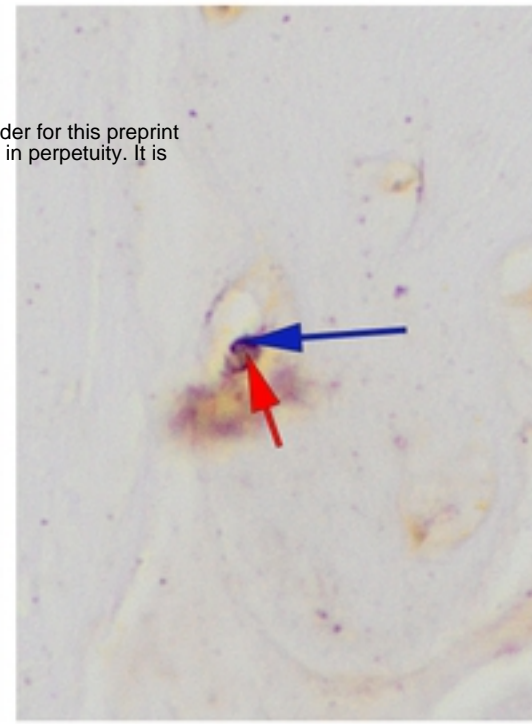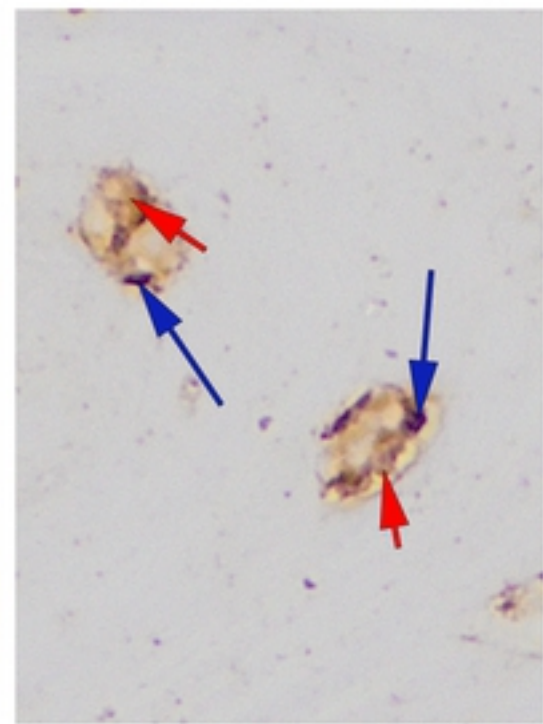

VEGF

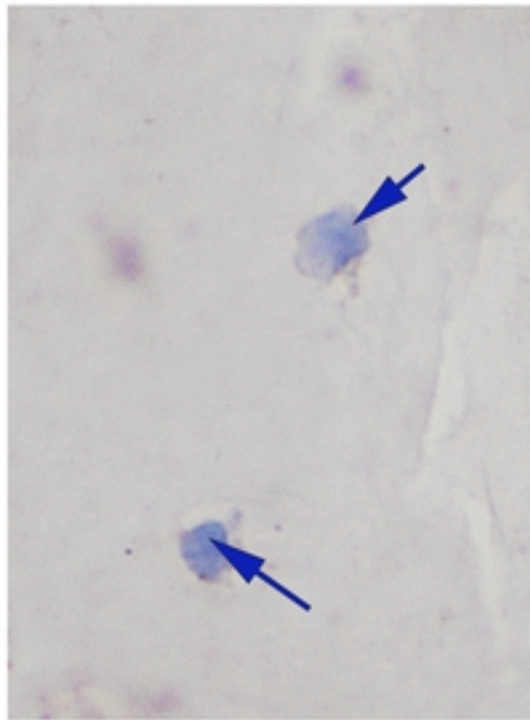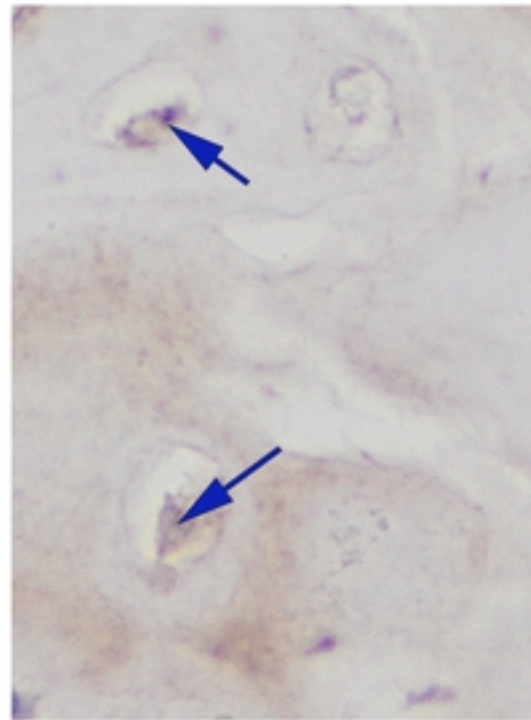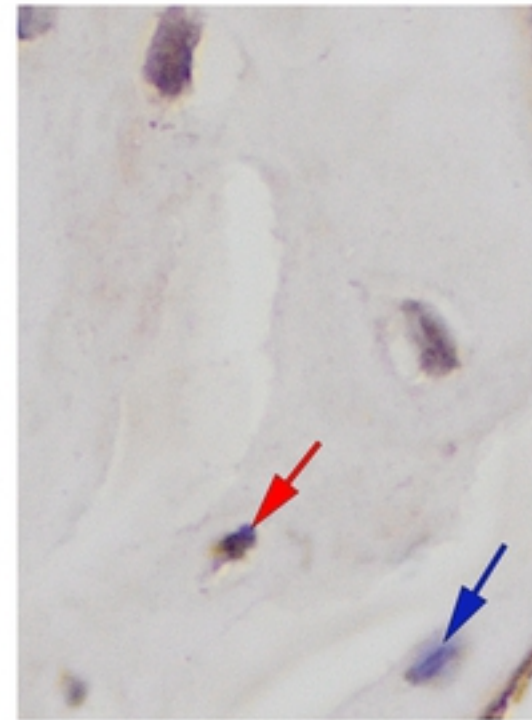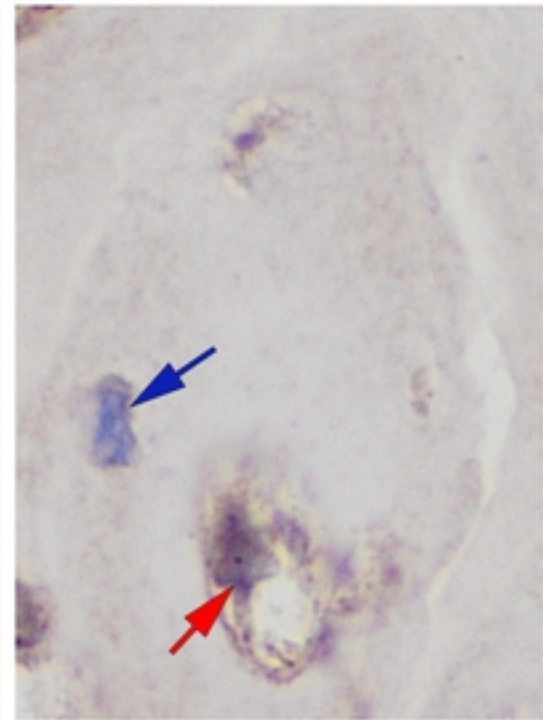

BMP 2

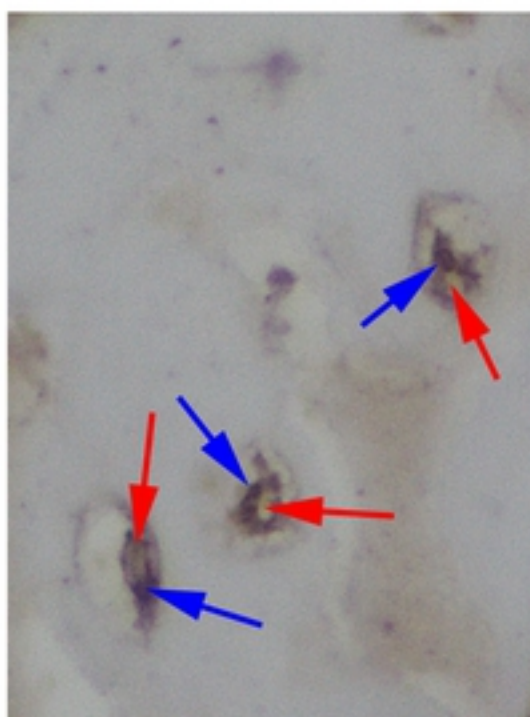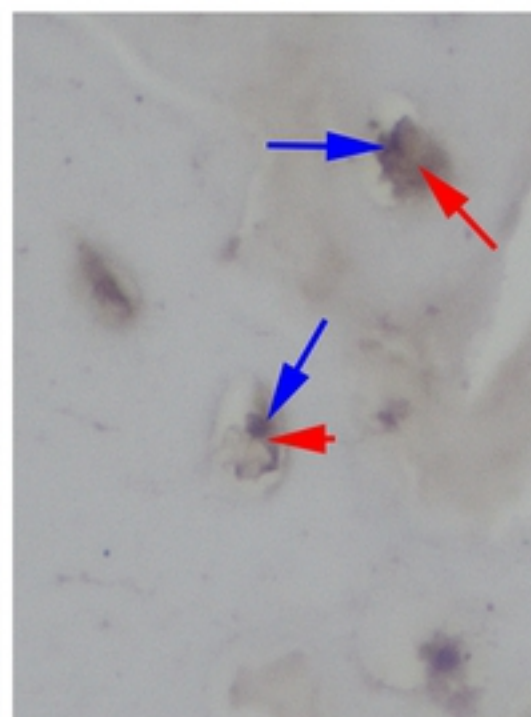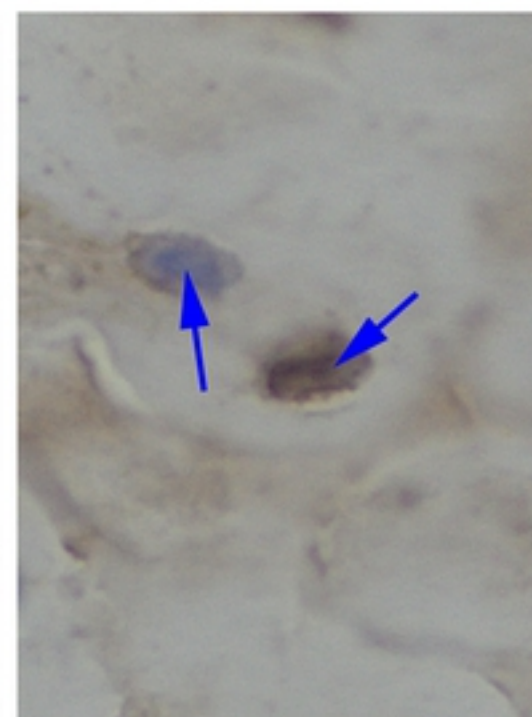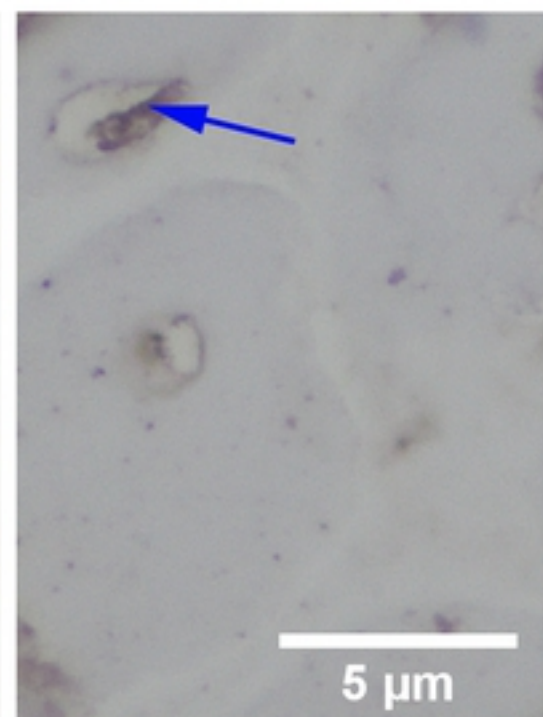

Figure
